# Supplementary material for: Synthesis of Natural O-Linked Carba-Disaccharides, (+)- and (−)-Pericosine E, and Their Analogues as α-Glucosidase Inhibitors
Source: Mar Drugs. 2017 Jan 23;15(1):22. doi: 10.3390/md15010022 (PMC5295242; doi:10.3390/md15010022)
Supplement: Supplementary file 1 [file marinedrugs-15-00022-s001.docx]

Supplementary Materials: Synthesis of Natural
*O*-Linked Carba-Disaccharides,
(+)- and (−)-Pericosine E, and Their Analogues as
α-Glucosidase Inhibitors

Yoshihide Usami, Koji Mizuki, Rikiya Kawahata, Makio Shibano, Atsuko Sekine,
Hiroki Yoneyama and Shinya Harusawa

1H- and 13C-NMR spectra of new compounds S-**2**–S-**27**.

| 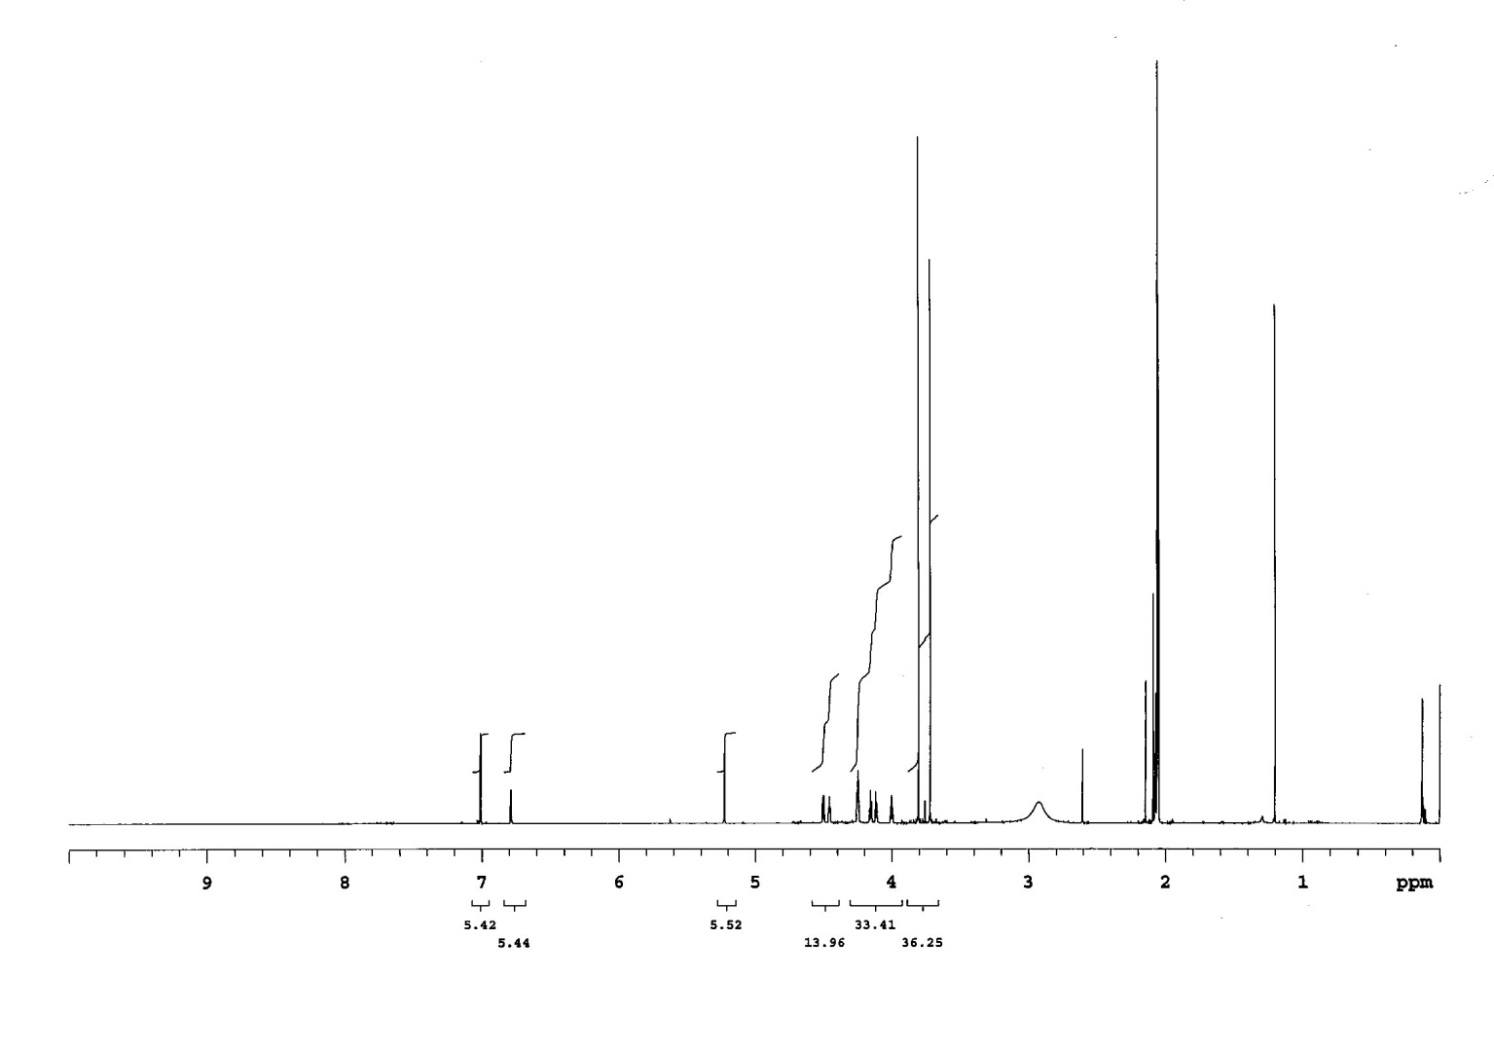 |
| --- |
| 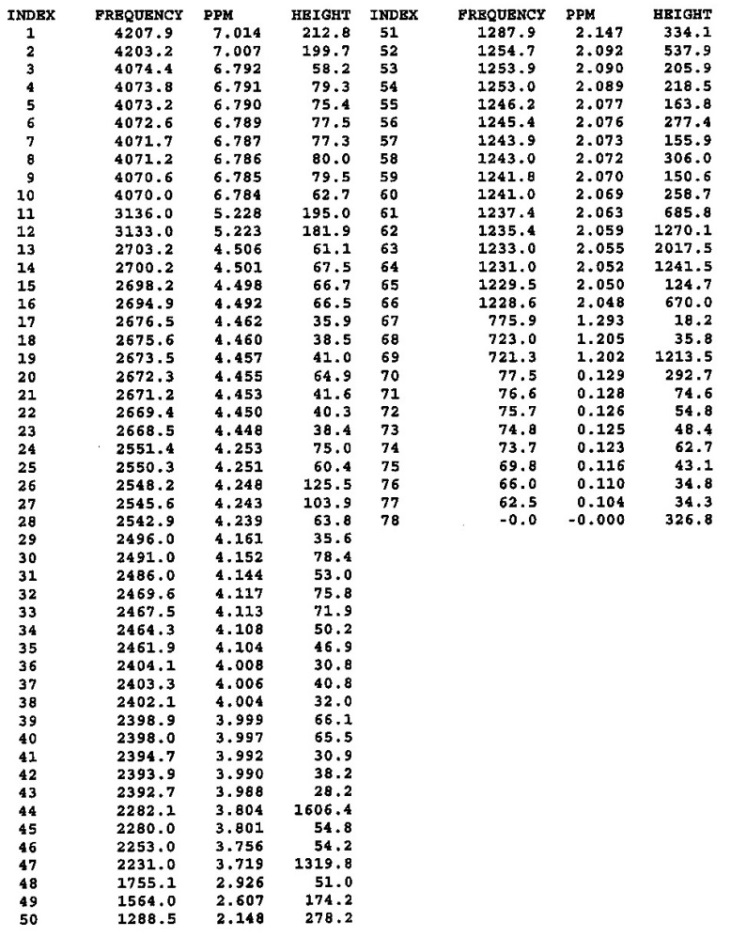 |

**Figure S1.** 1H-NMR spectrum of compound (−)-**21** in acetone-*d*6 (600 MHz).

| 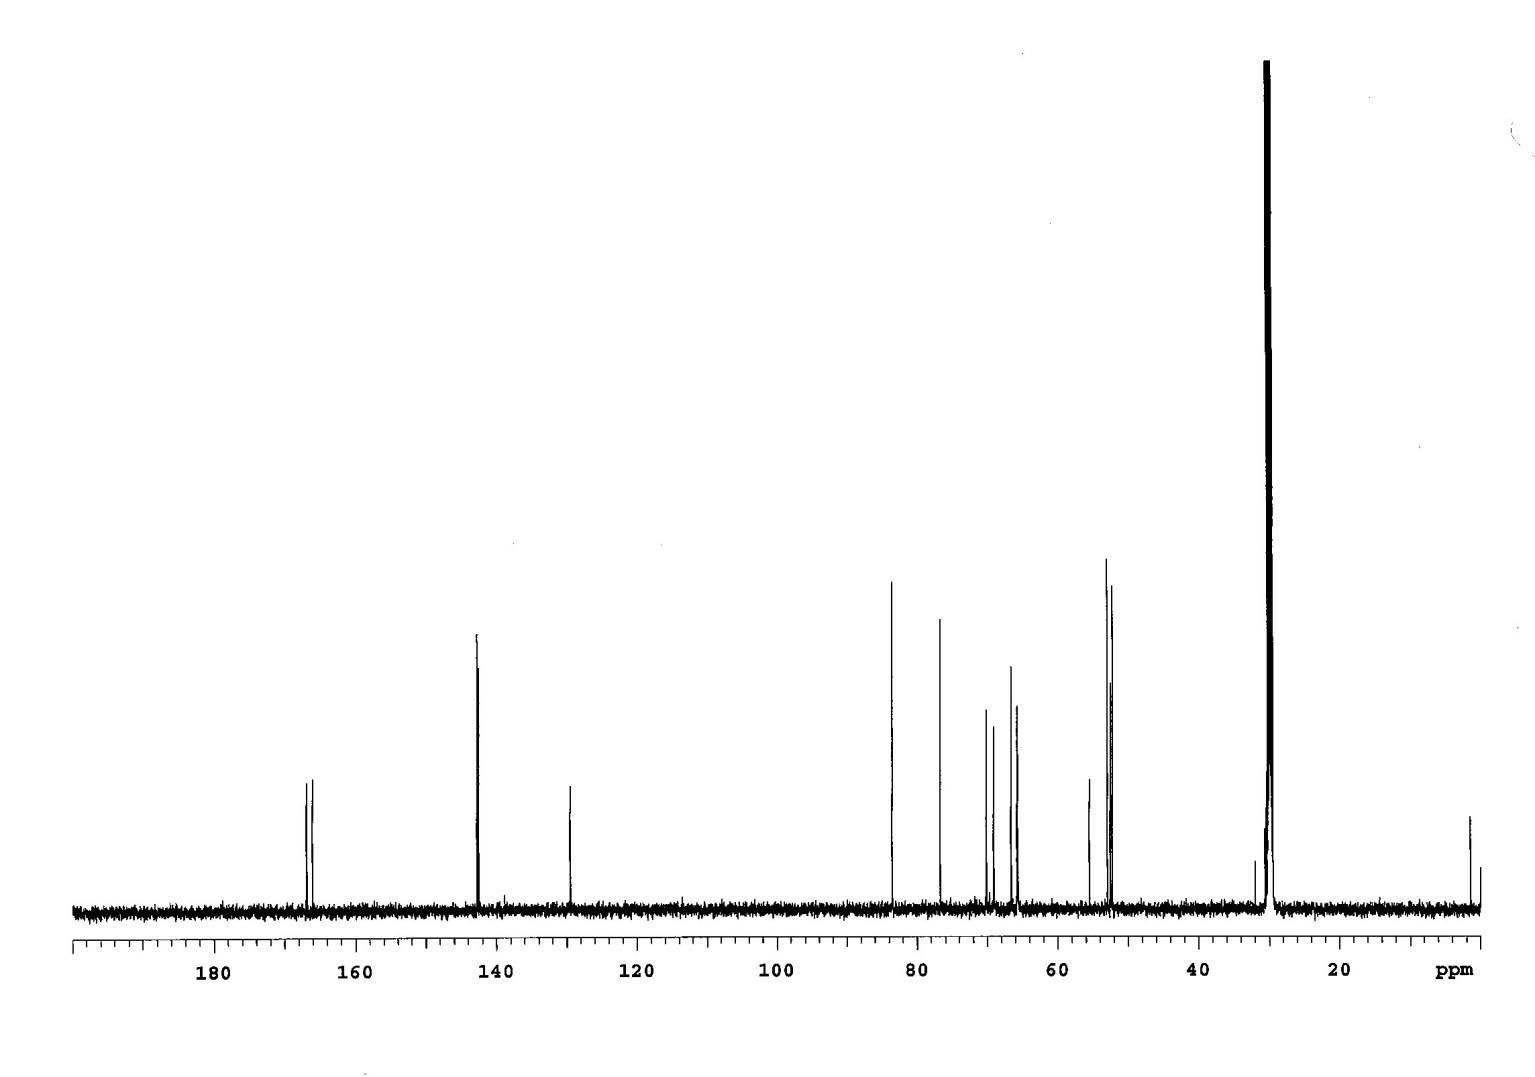 |
| --- |
| 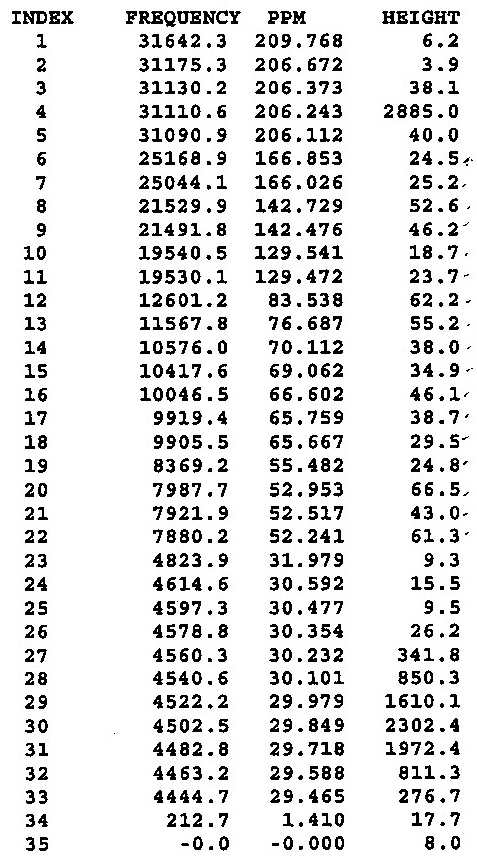 |

**Figure S2.** 13C-NMR spectrum of compound (−)-**21** in acetone-*d*6 (150 MHz).

| 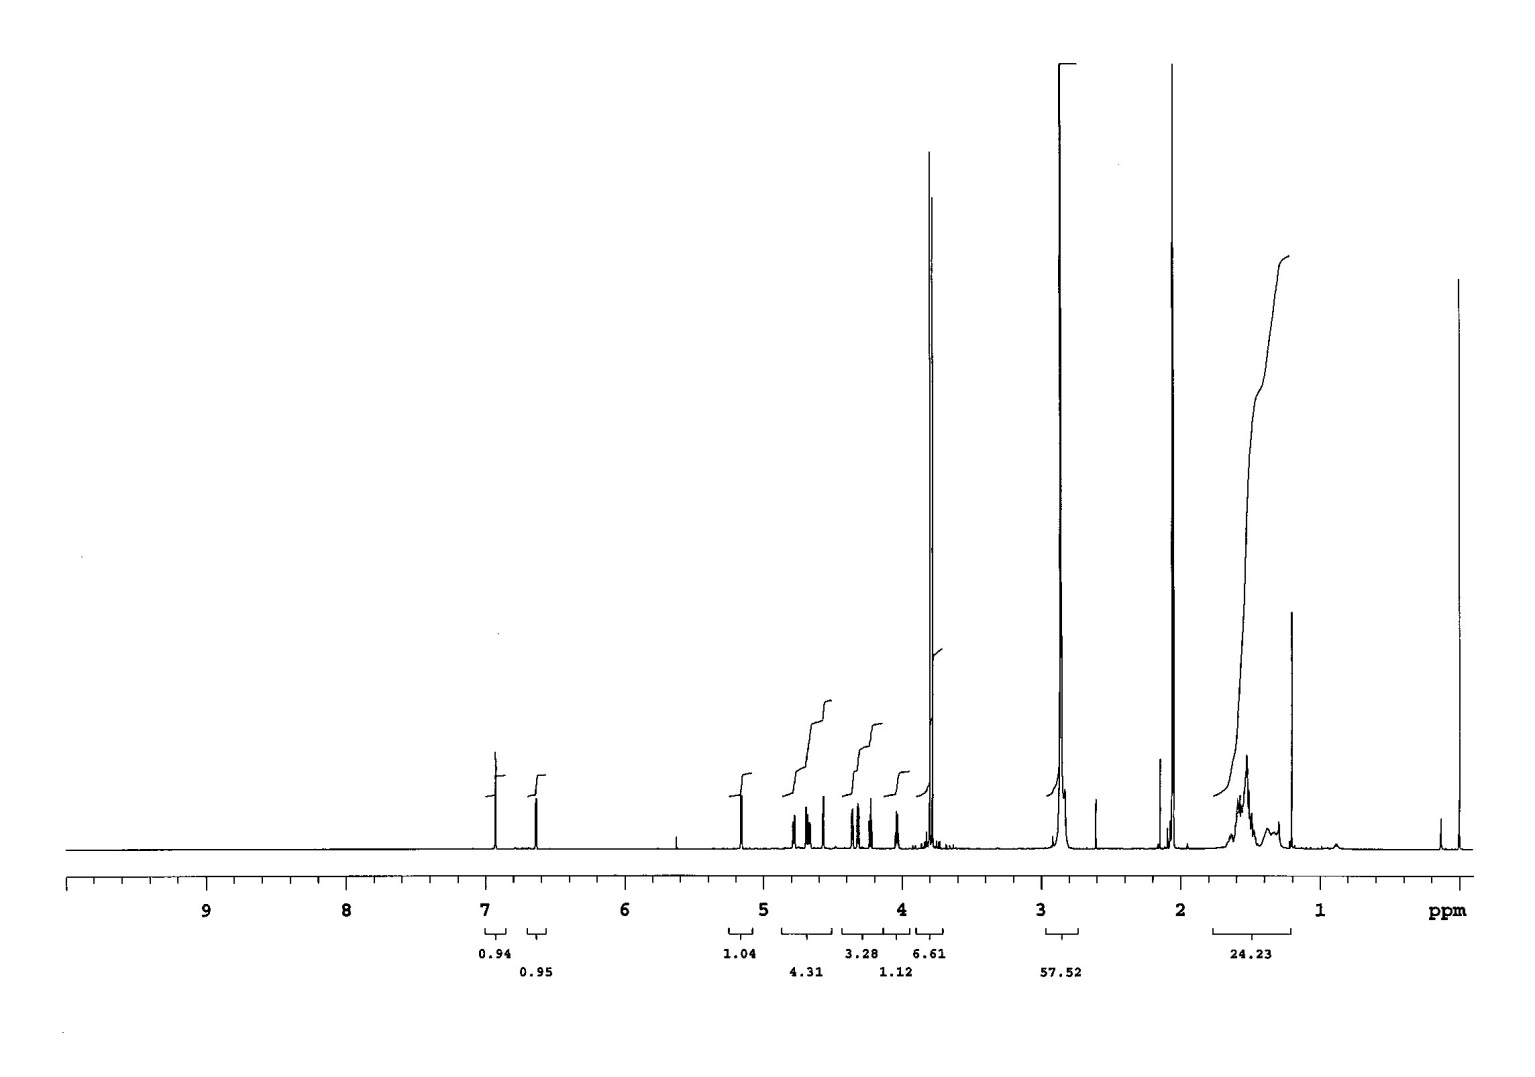 |
| --- |
| 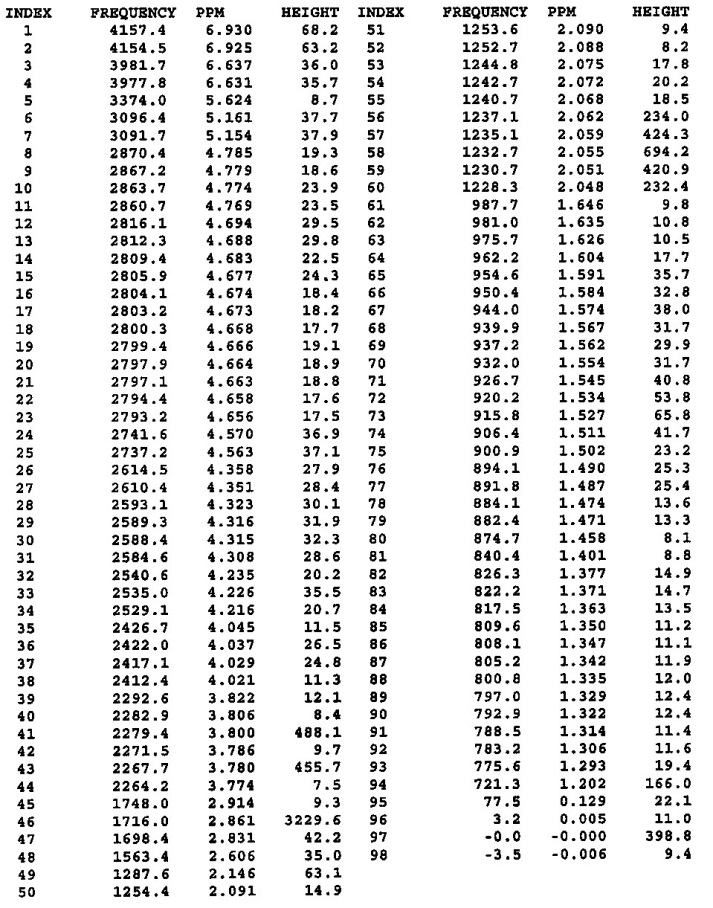 |

**Figure S3.** 1H-NMR spectrum of compound (+)-**24** in acetone-*d*6 (600 MHz).

| 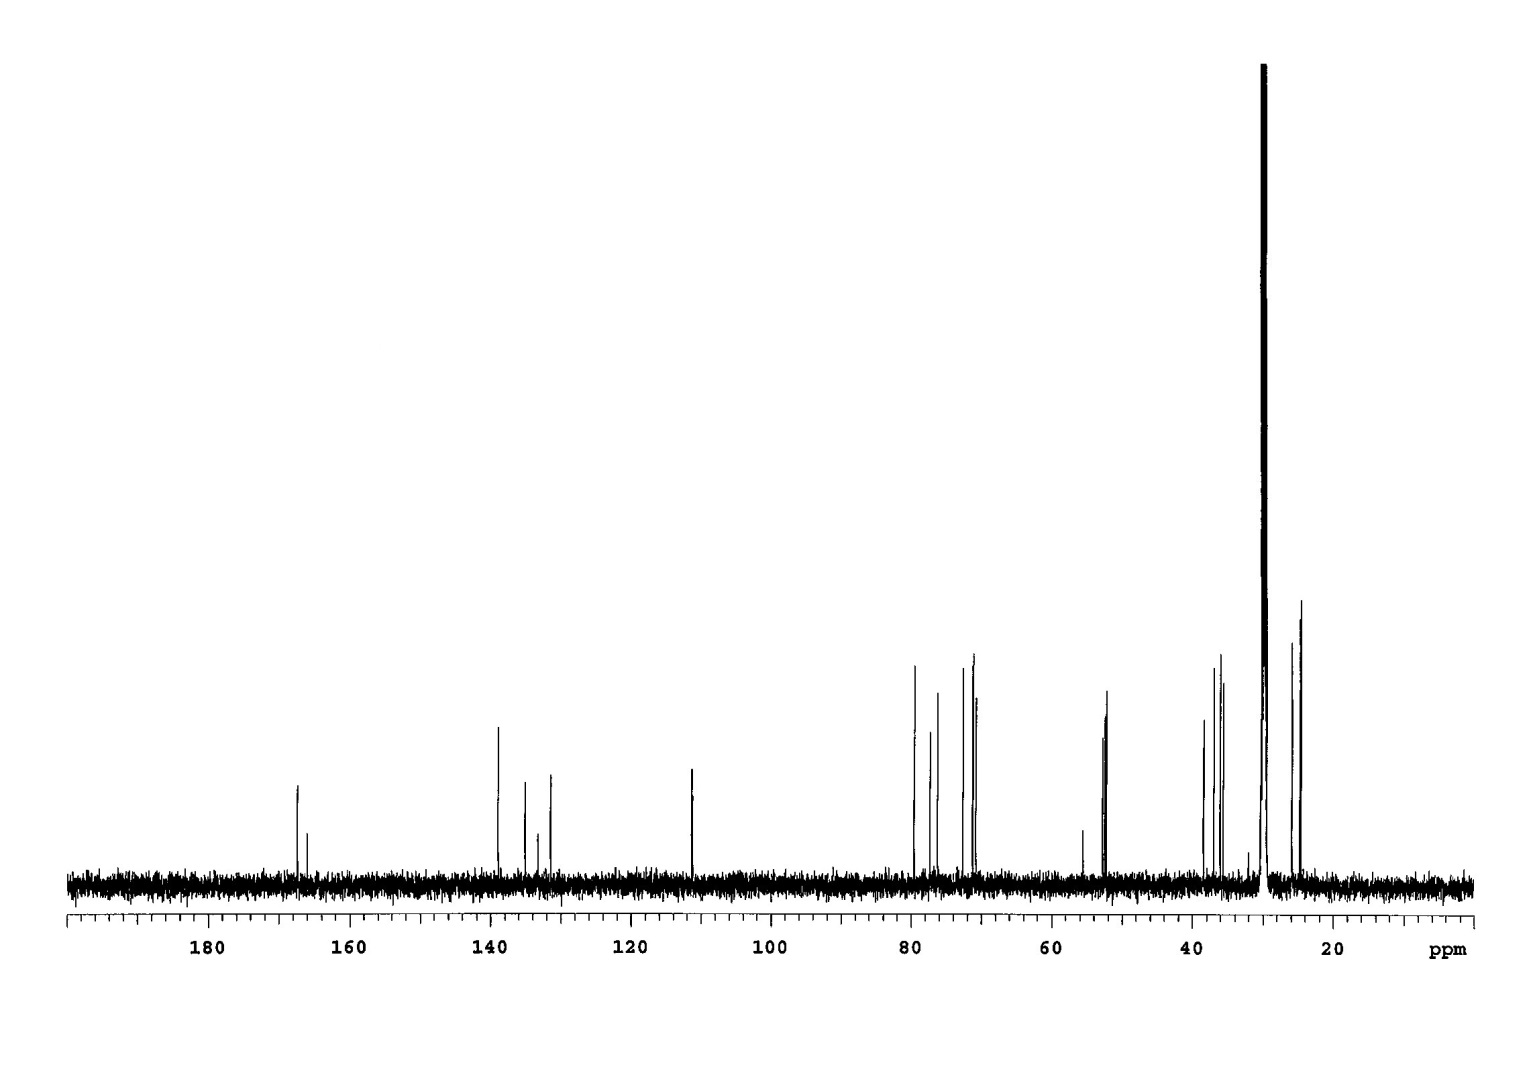 |
| --- |
| 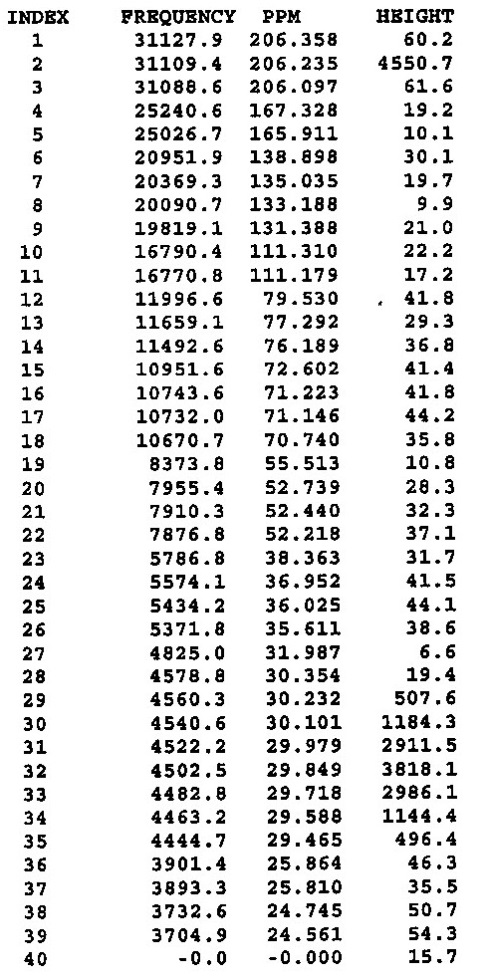 |

**Figure S4.** 13C-NMR spectrum of compound (+)-**24** in acetone-*d*6 (150 MHz).

| 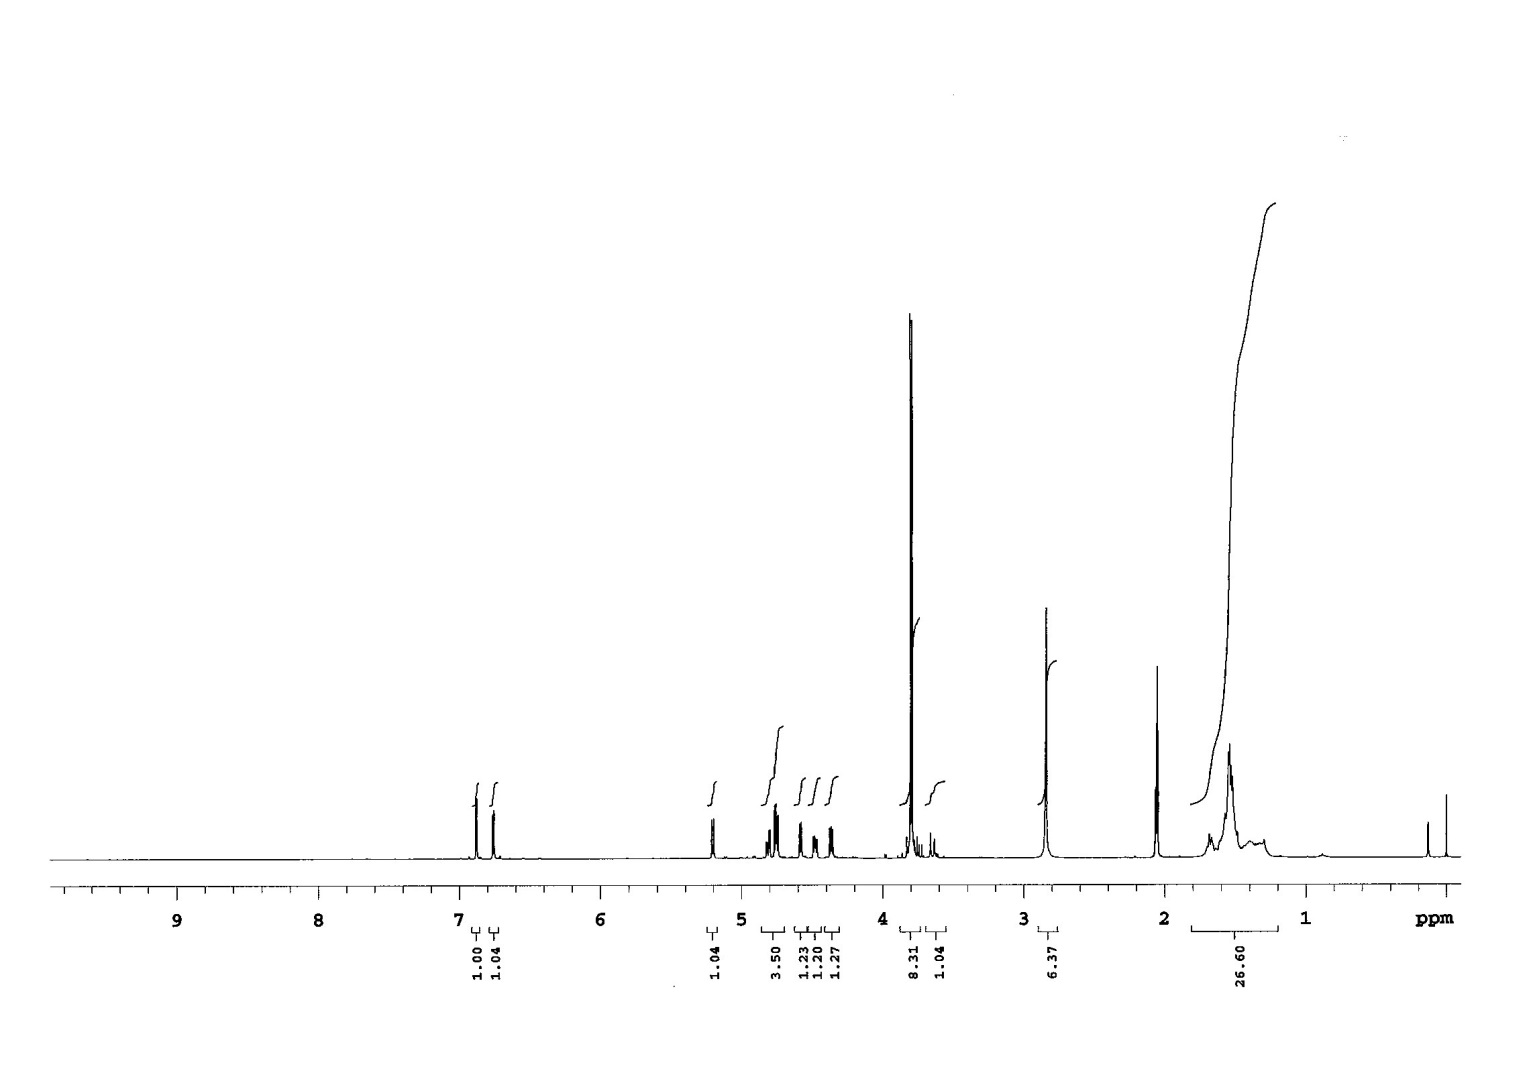 |
| --- |
| 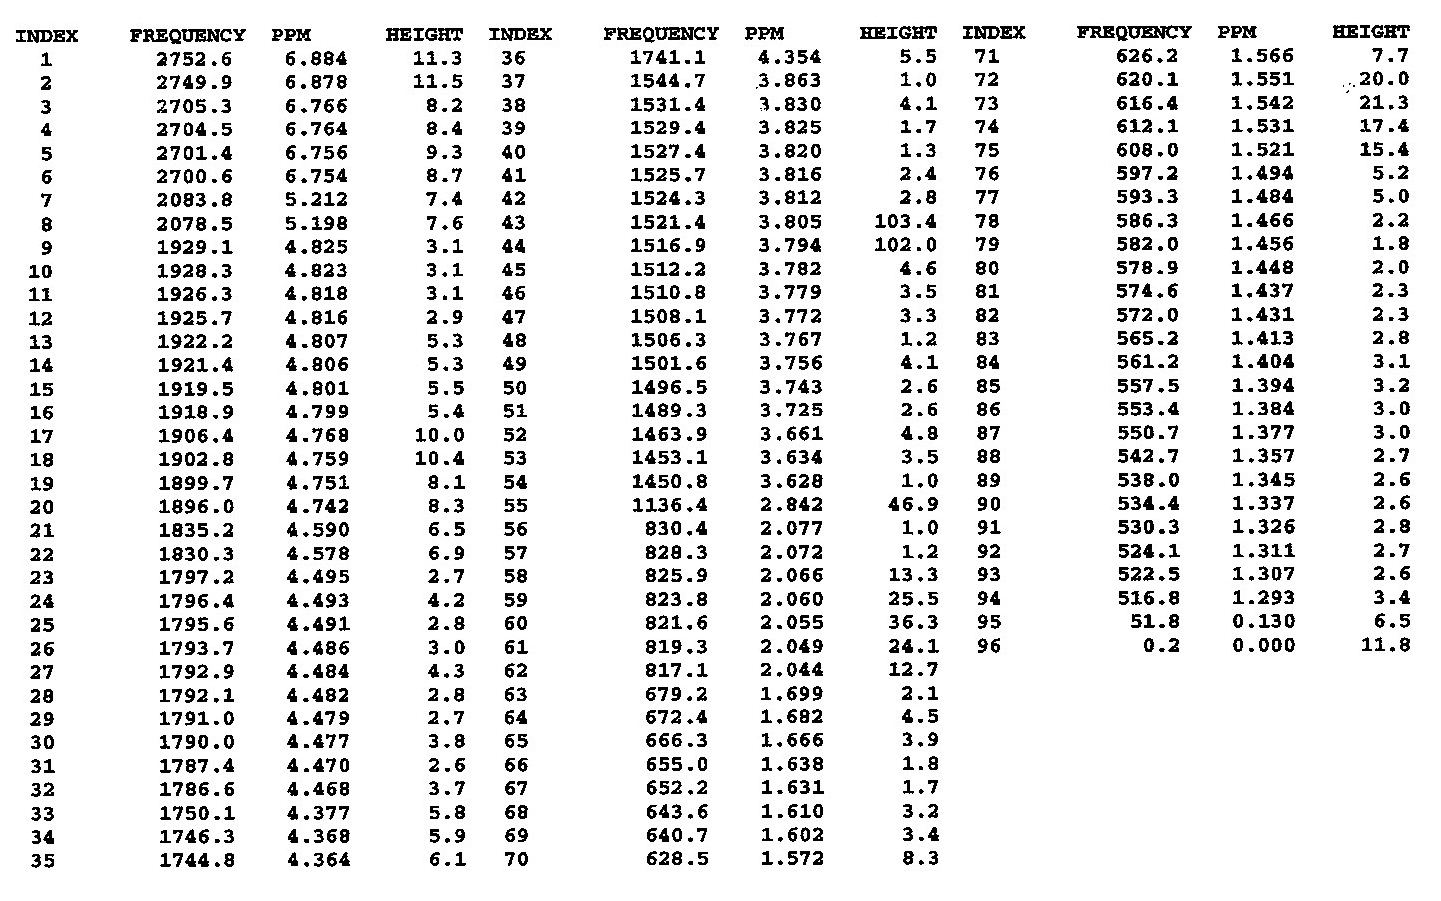 |

**Figure S5.** 1H-NMR spectrum of compound (+)-**25** in acetone-*d*6 (400 MHz).

| 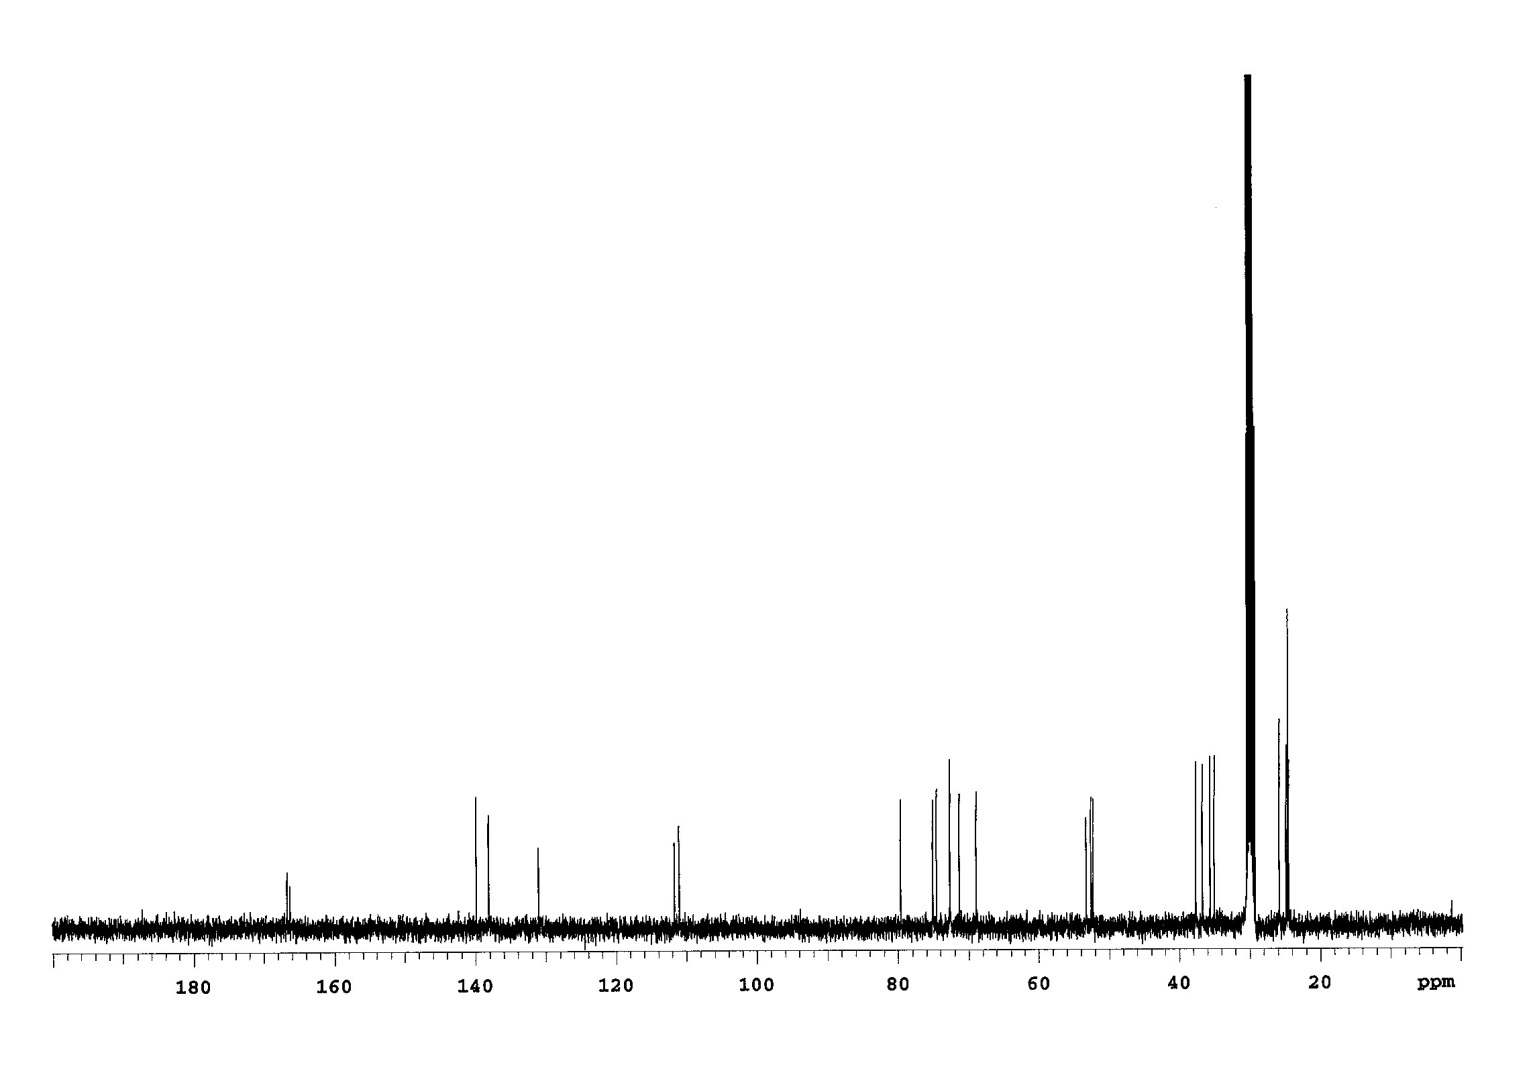 |
| --- |
| 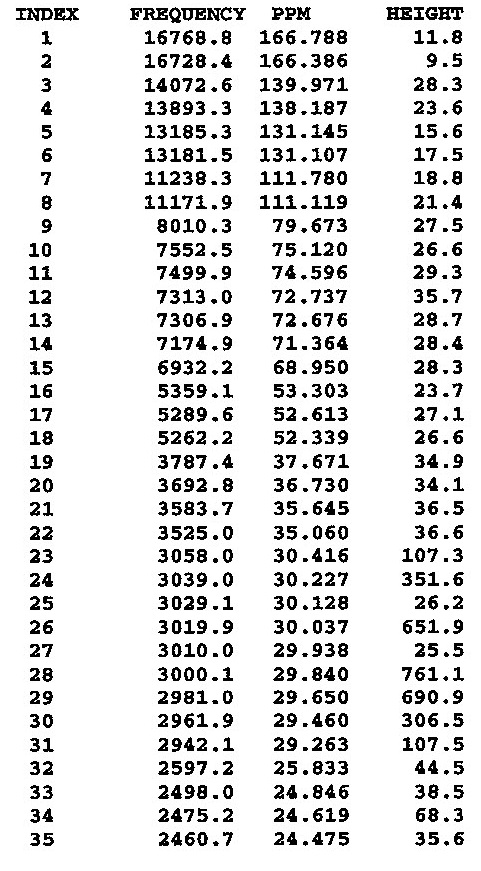 |

**Figure S6.** 13C-NMR spectrum of compound (+)-**25** in acetone-*d*6 (100 MHz).

| 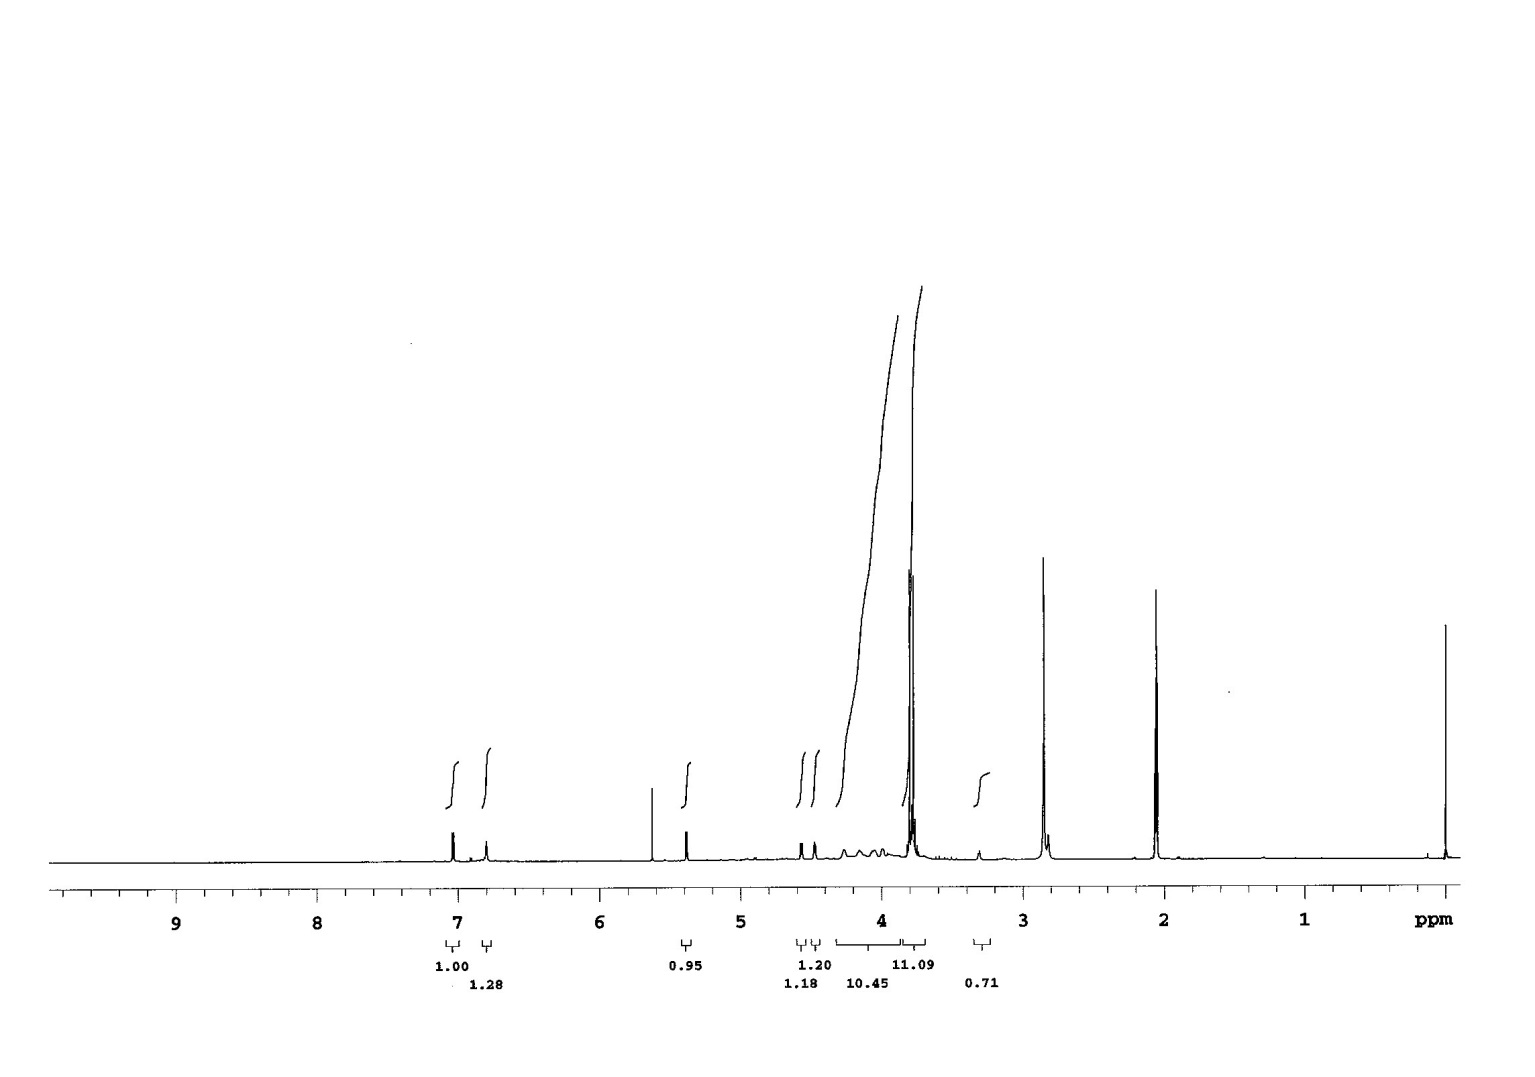 |
| --- |
| 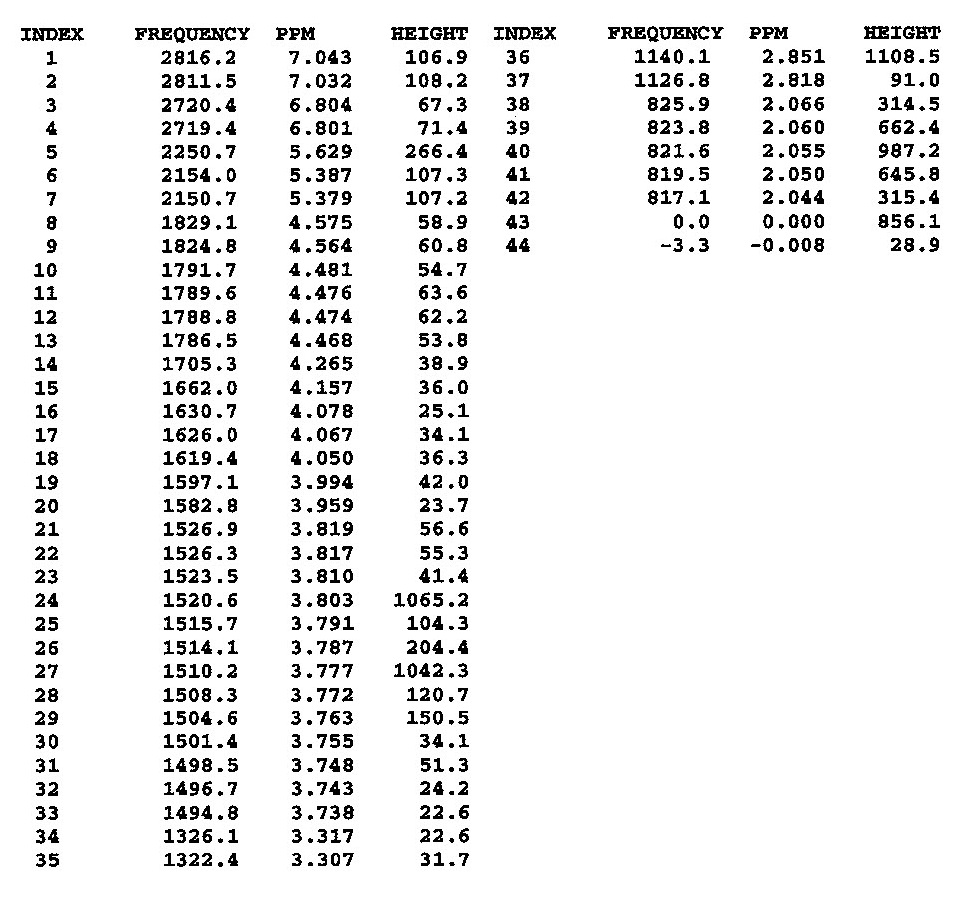 |

**Figure S7.** 1H-NMR spectrum of compound (+)-**22** in acetone-*d*6 (400 MHz).


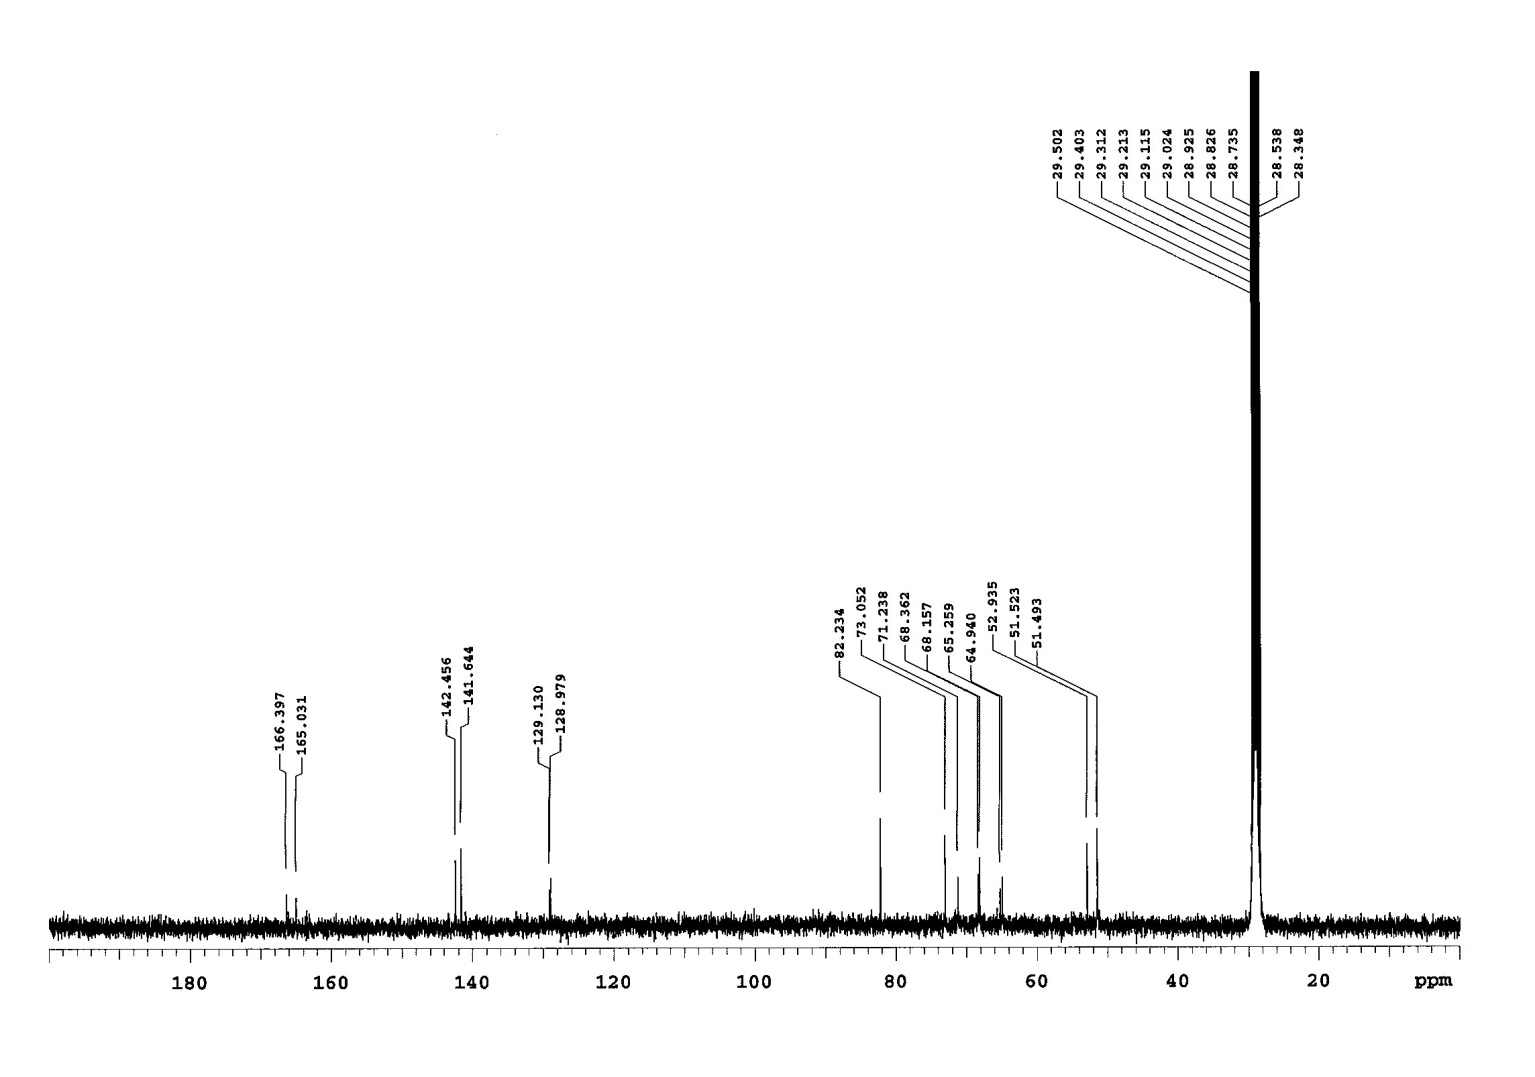


**Figure S8.** 13C-NMR spectrum of compound (+)-**22** in acetone-*d*6 (100 MHz).

| 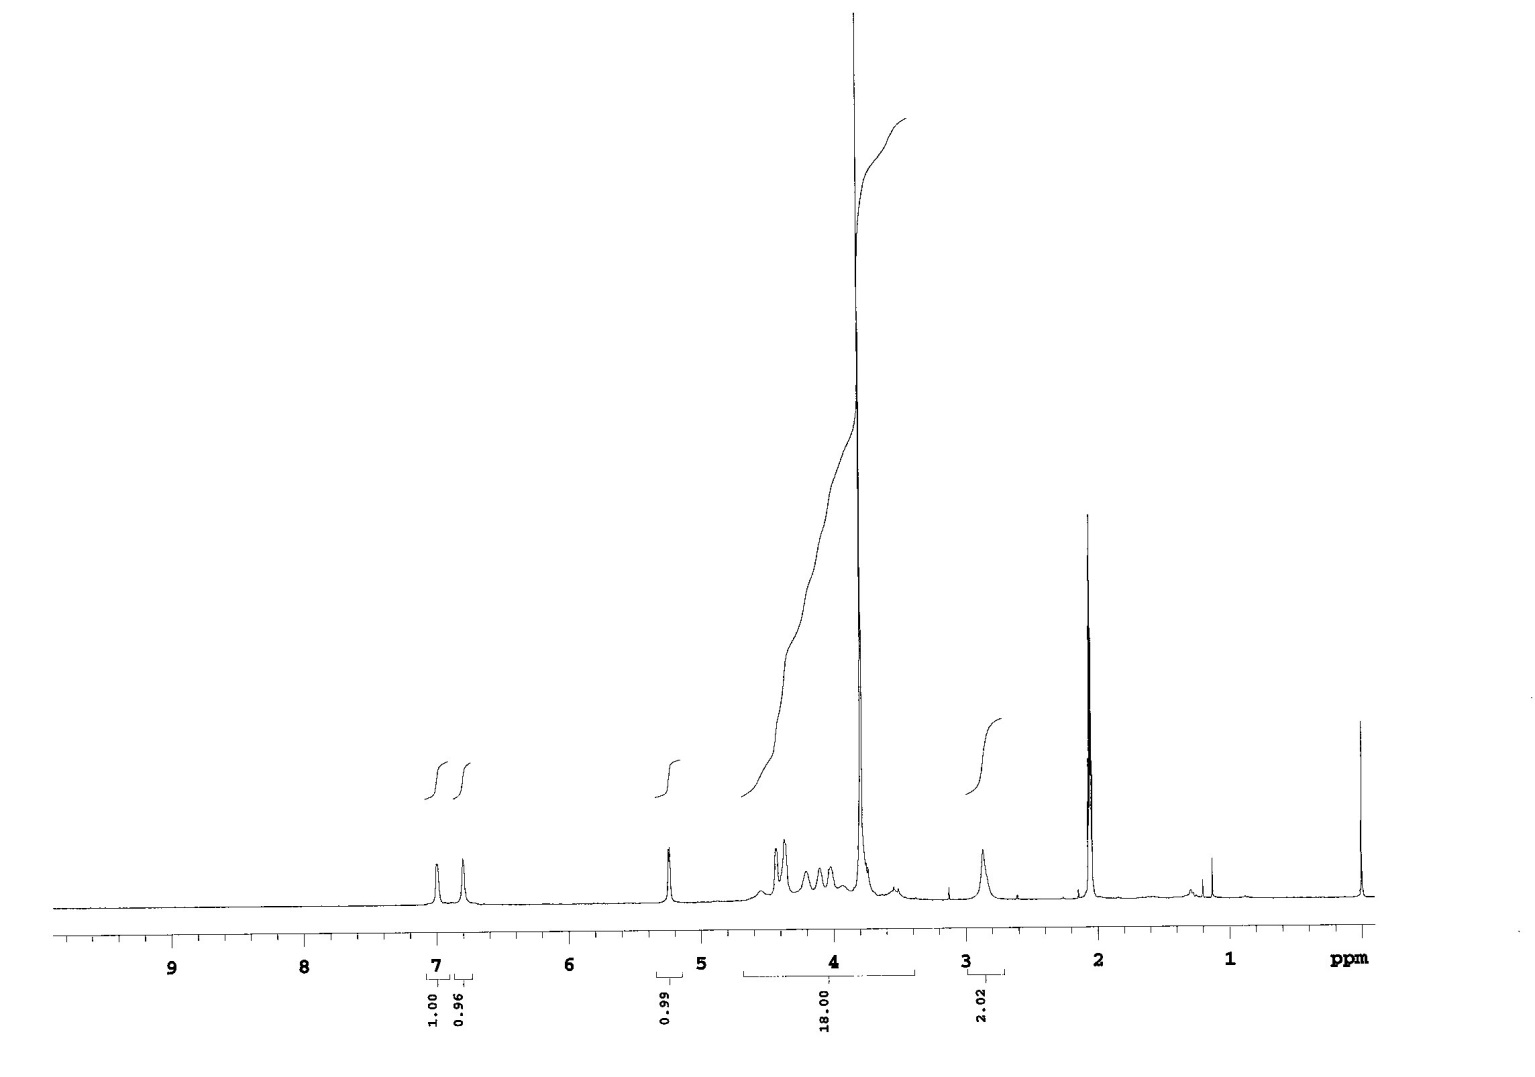 |
| --- |
| 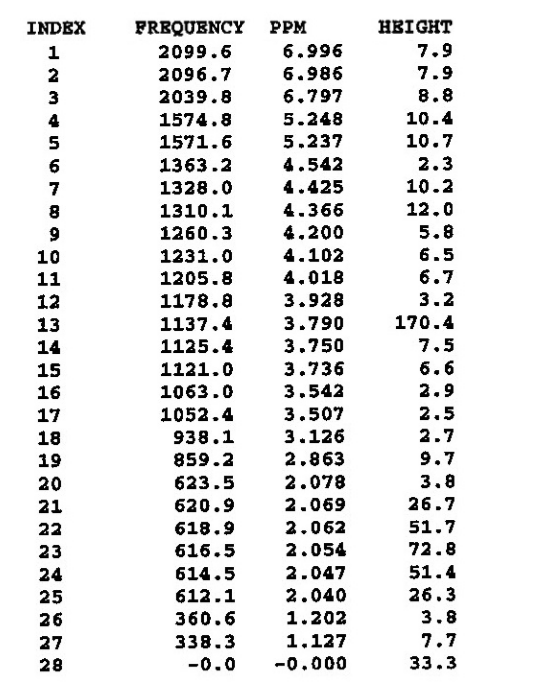 |

**Figure S9.** 1H-NMR spectrum of compound (+)-**23** in acetone-*d*6 (300 MHz).

| 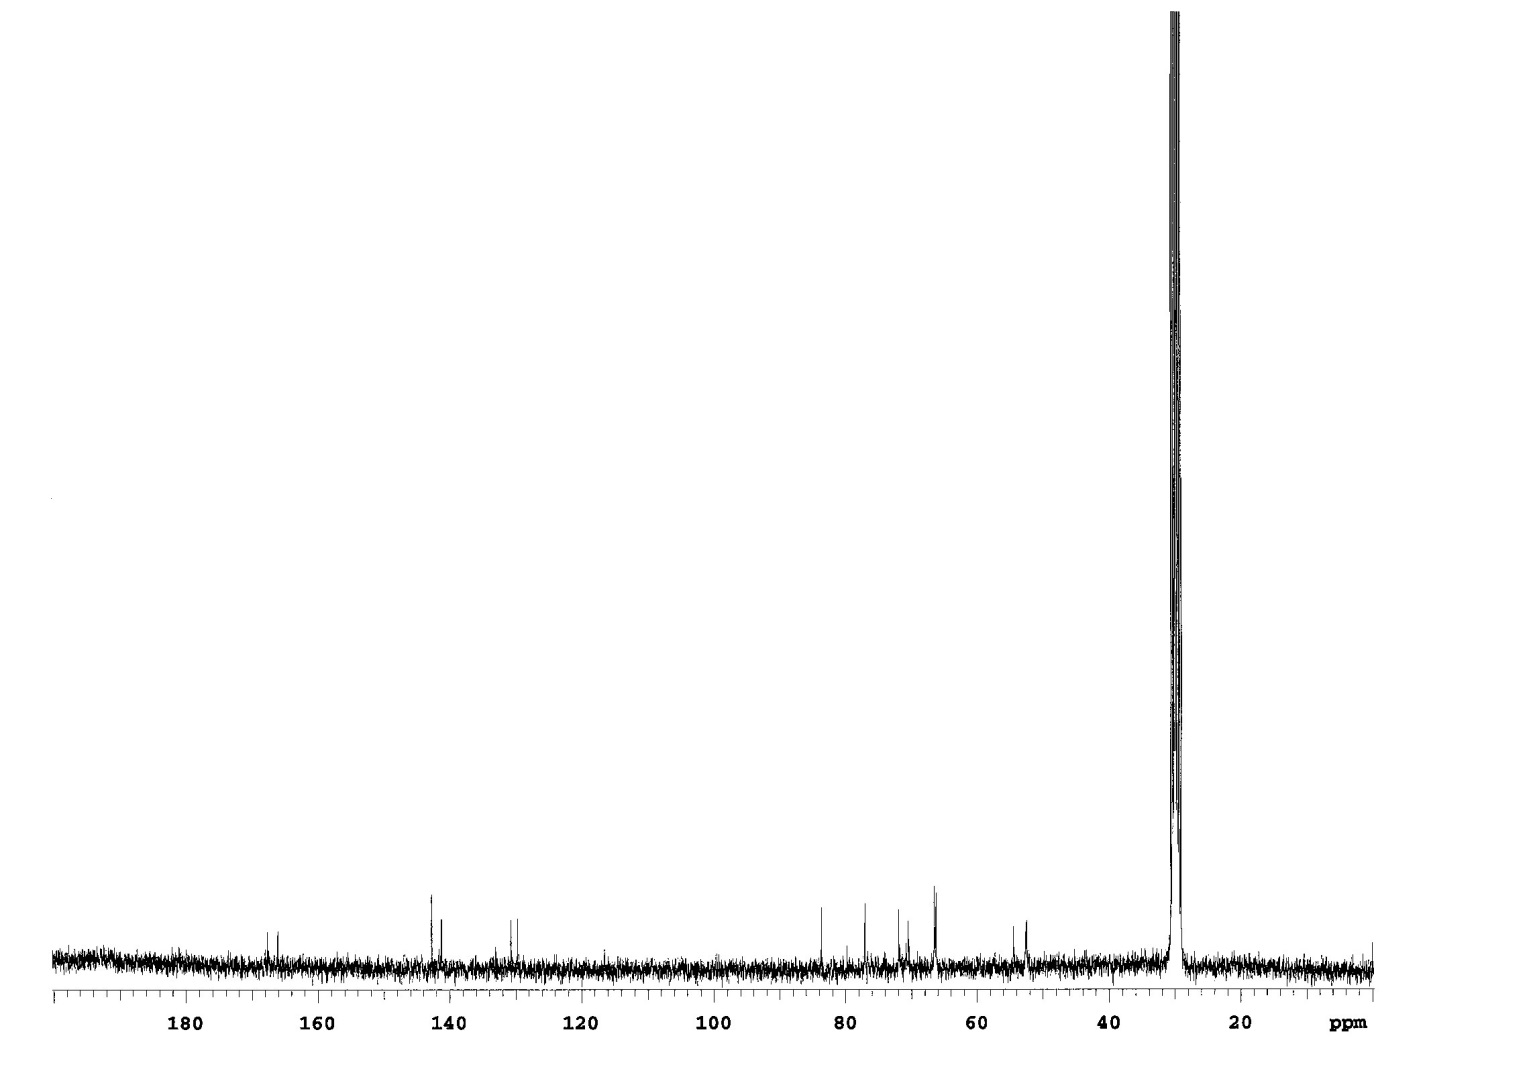 |
| --- |
| 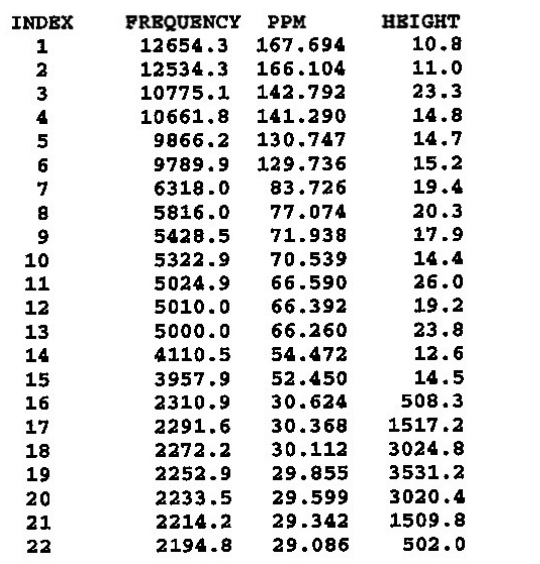 |

**Figure S10.** 13C-NMR spectrum of compound (+)-**23** in acetone-*d*6 (75 MHz).

| 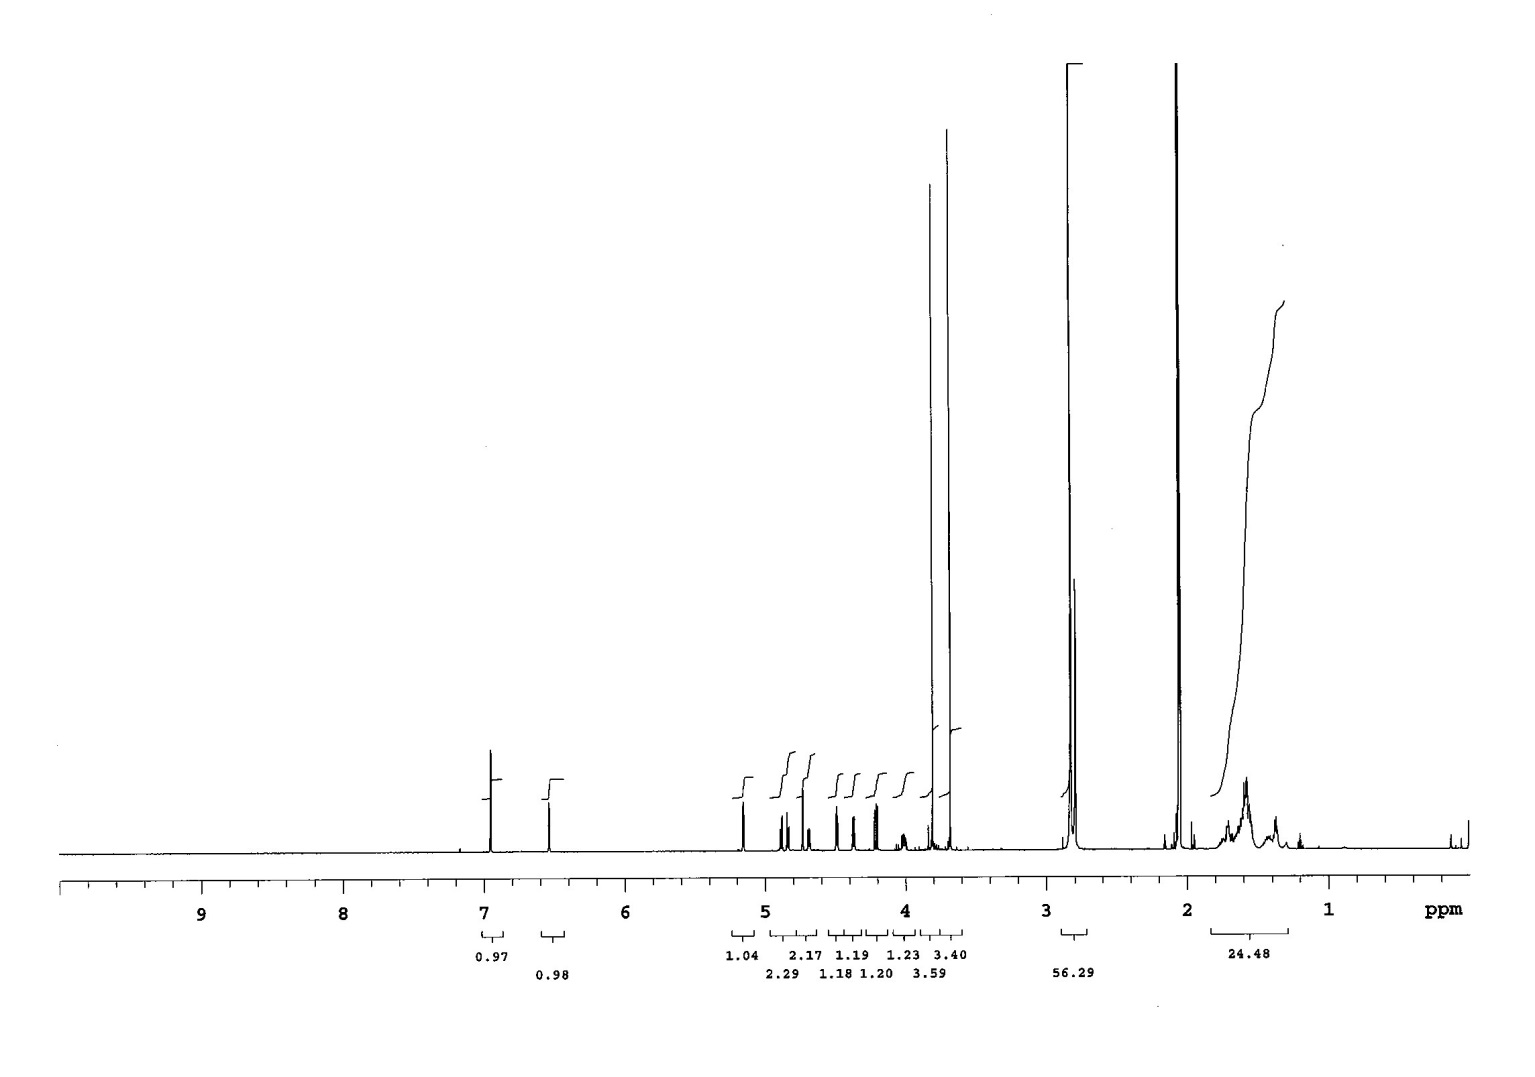 |
| --- |
| 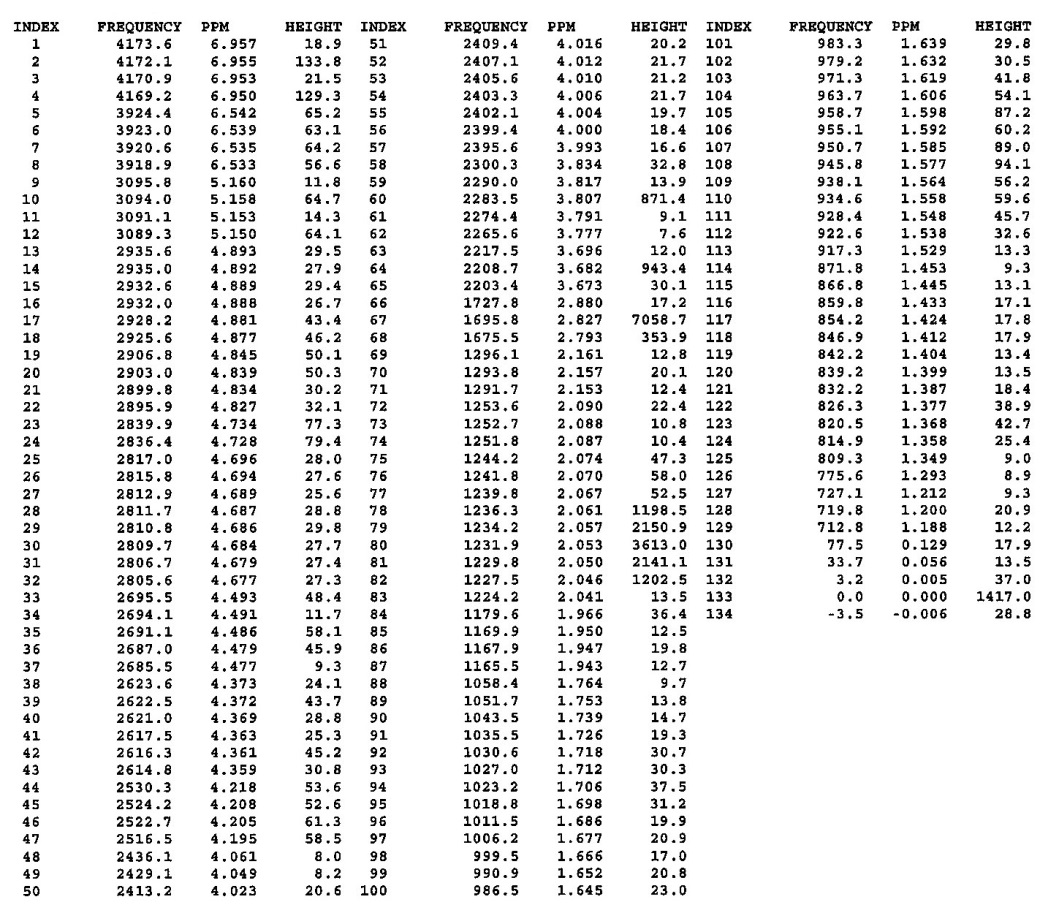 |

**Figure S11.** 1H-NMR spectrum of compound (+)-**8** in acetone-*d*6 (600 MHz).

| 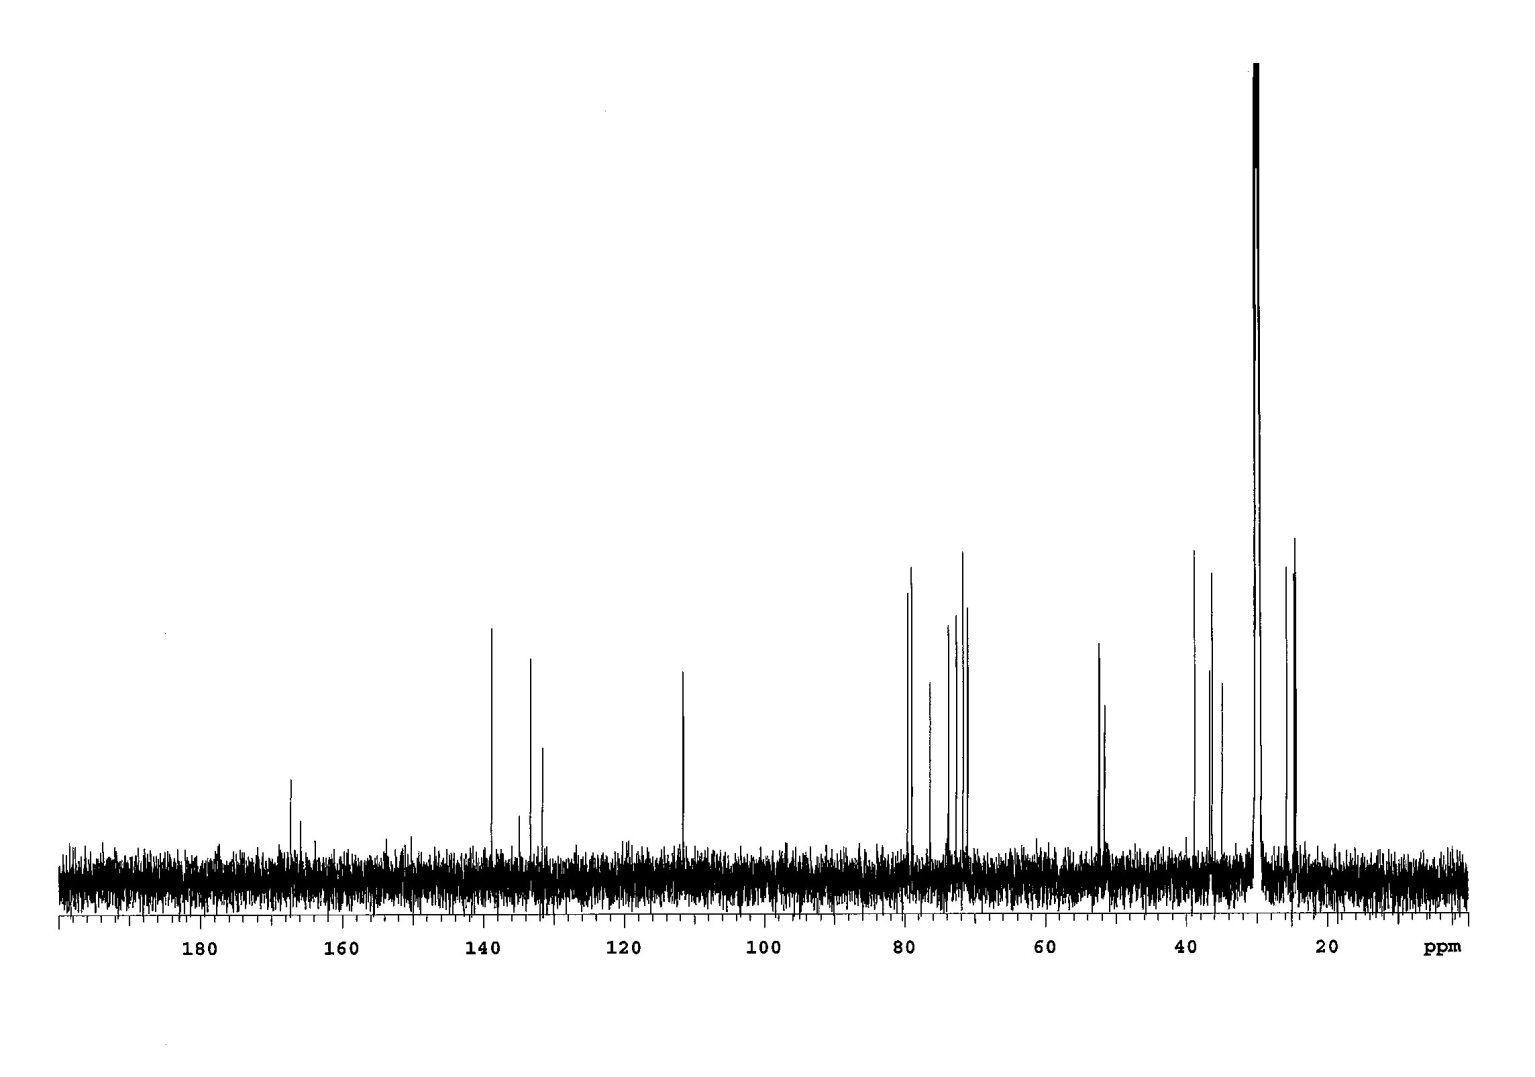 |
| --- |
| 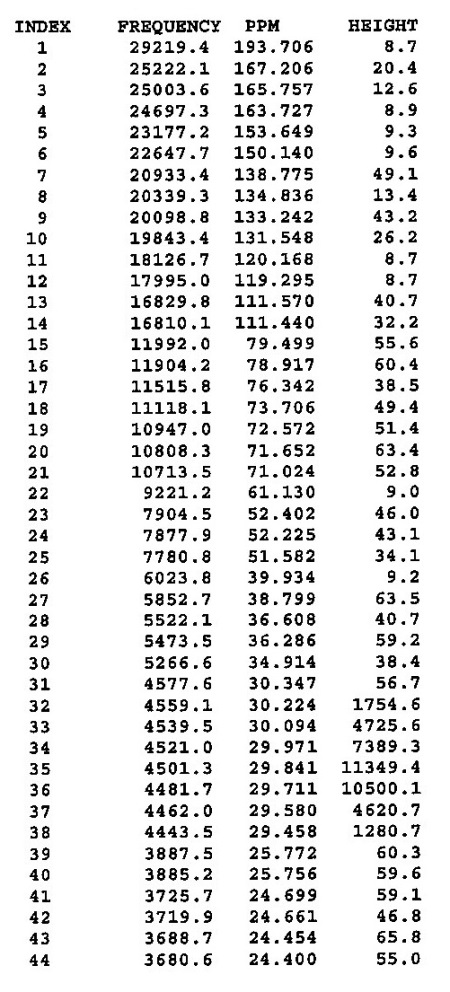 |

**Figure S12.** 13C-NMR spectrum of compound (+)-**8** in acetone-*d*6 (150 MHz).

| 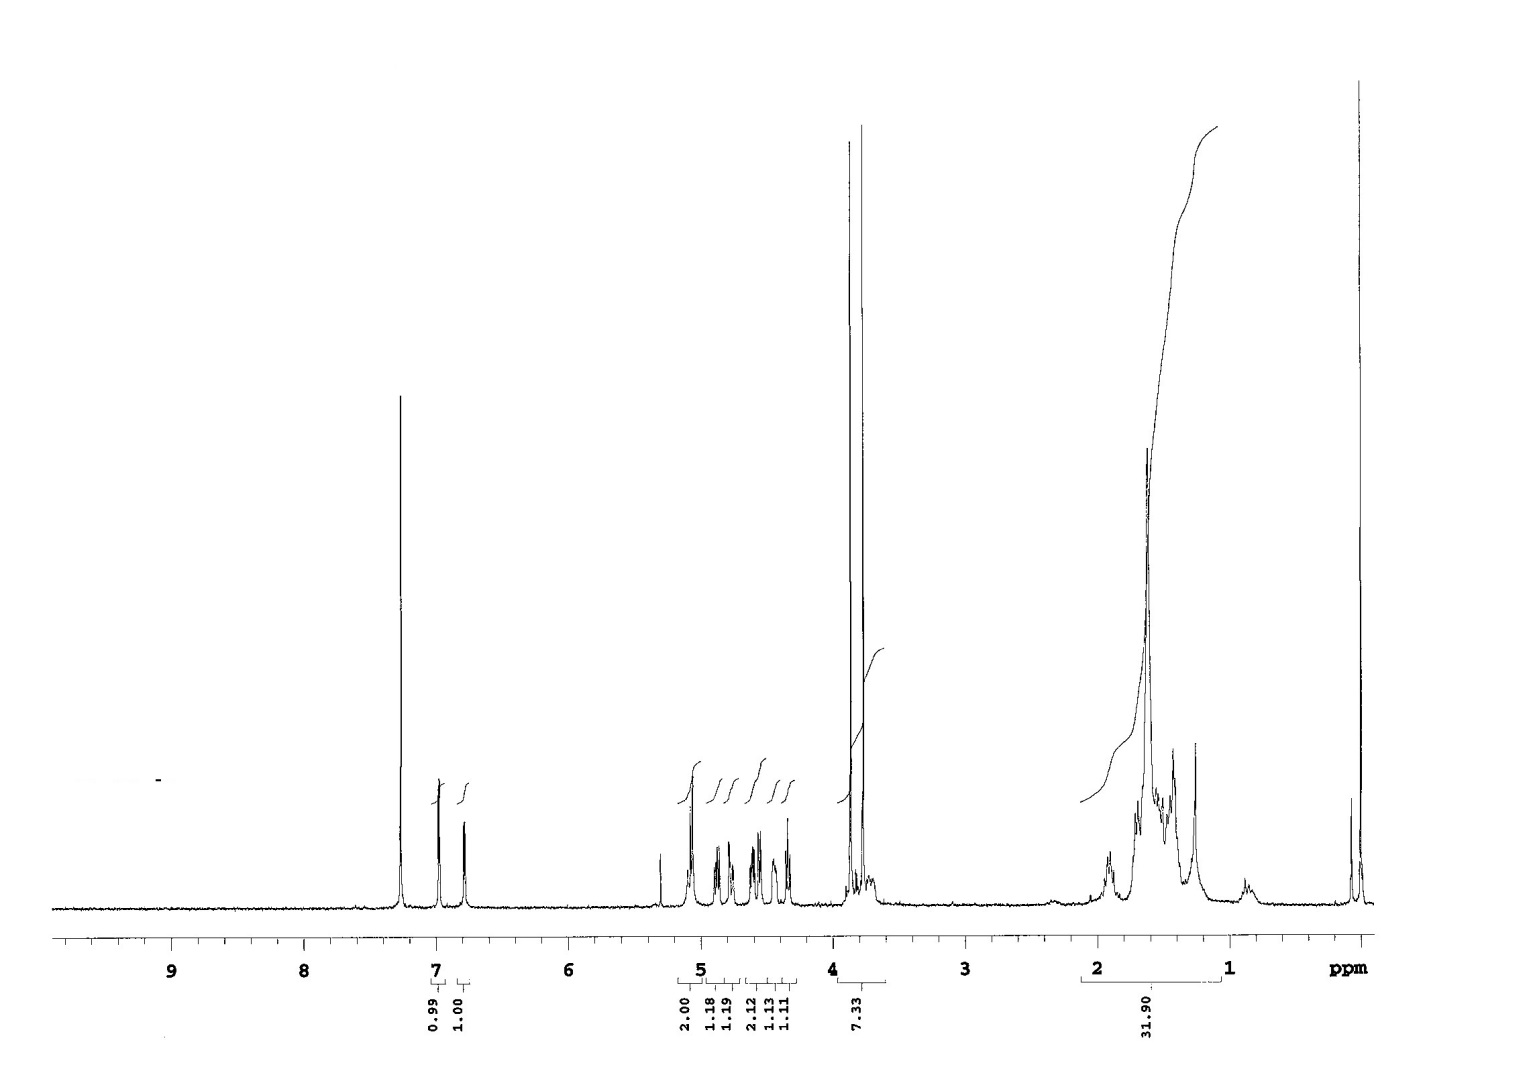 |
| --- |
| 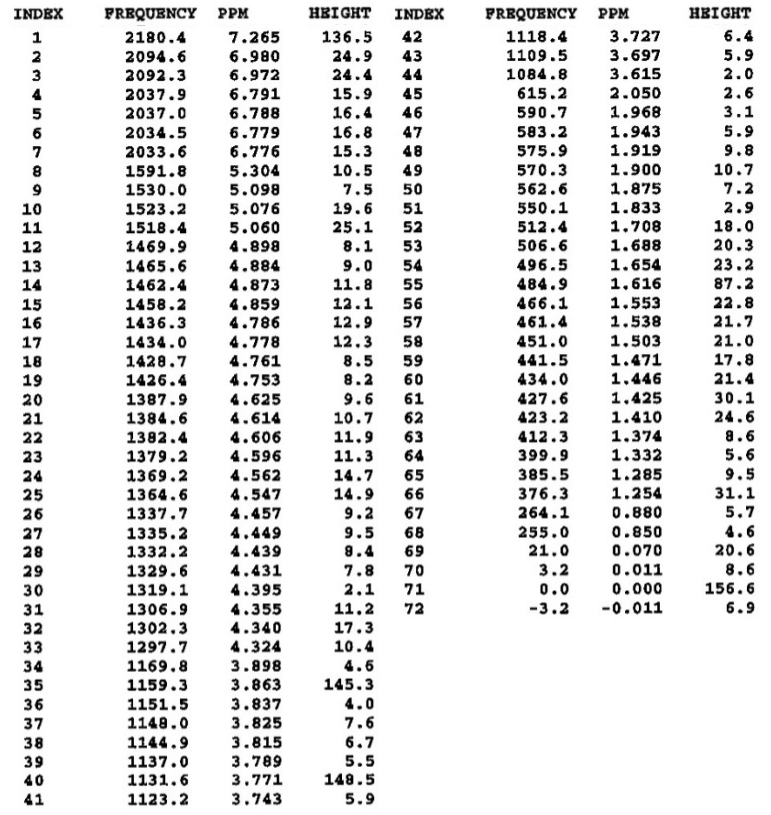 |

**Figure S13.** 1H-NMR spectrum of compound (+)-**20** in CDCl3 (300 MHz).


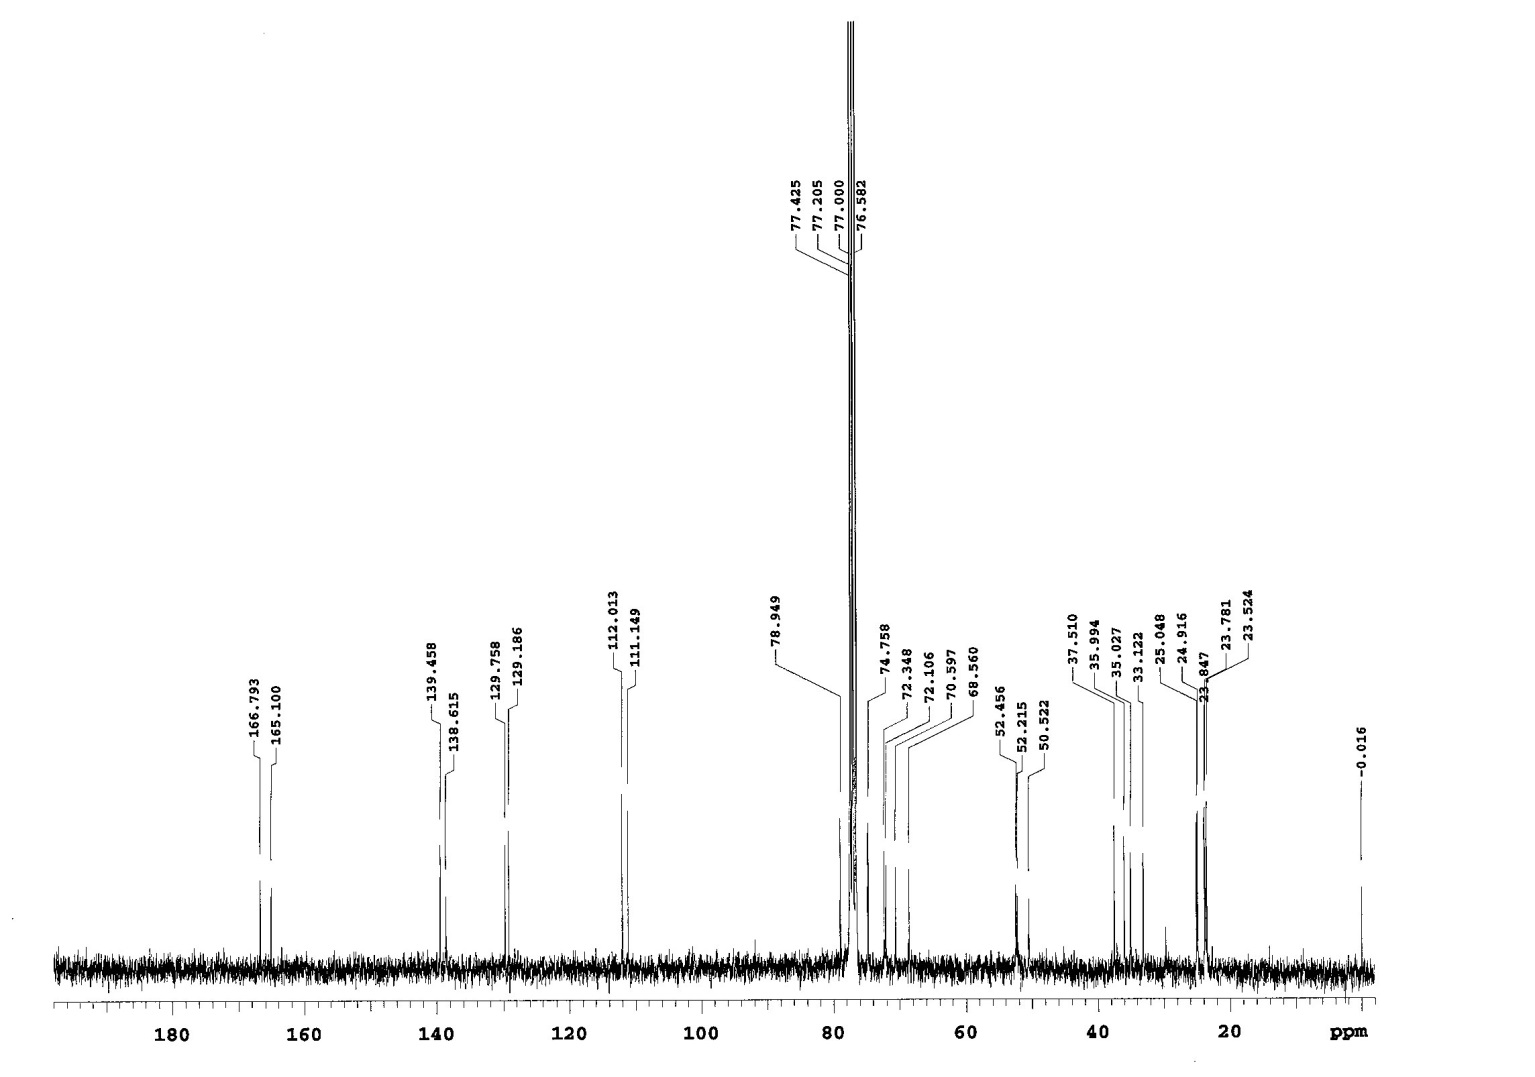


**Figure S14.** 13C-NMR spectrum of compound (+)-**20** in CDCl3 (75 MHz).

| 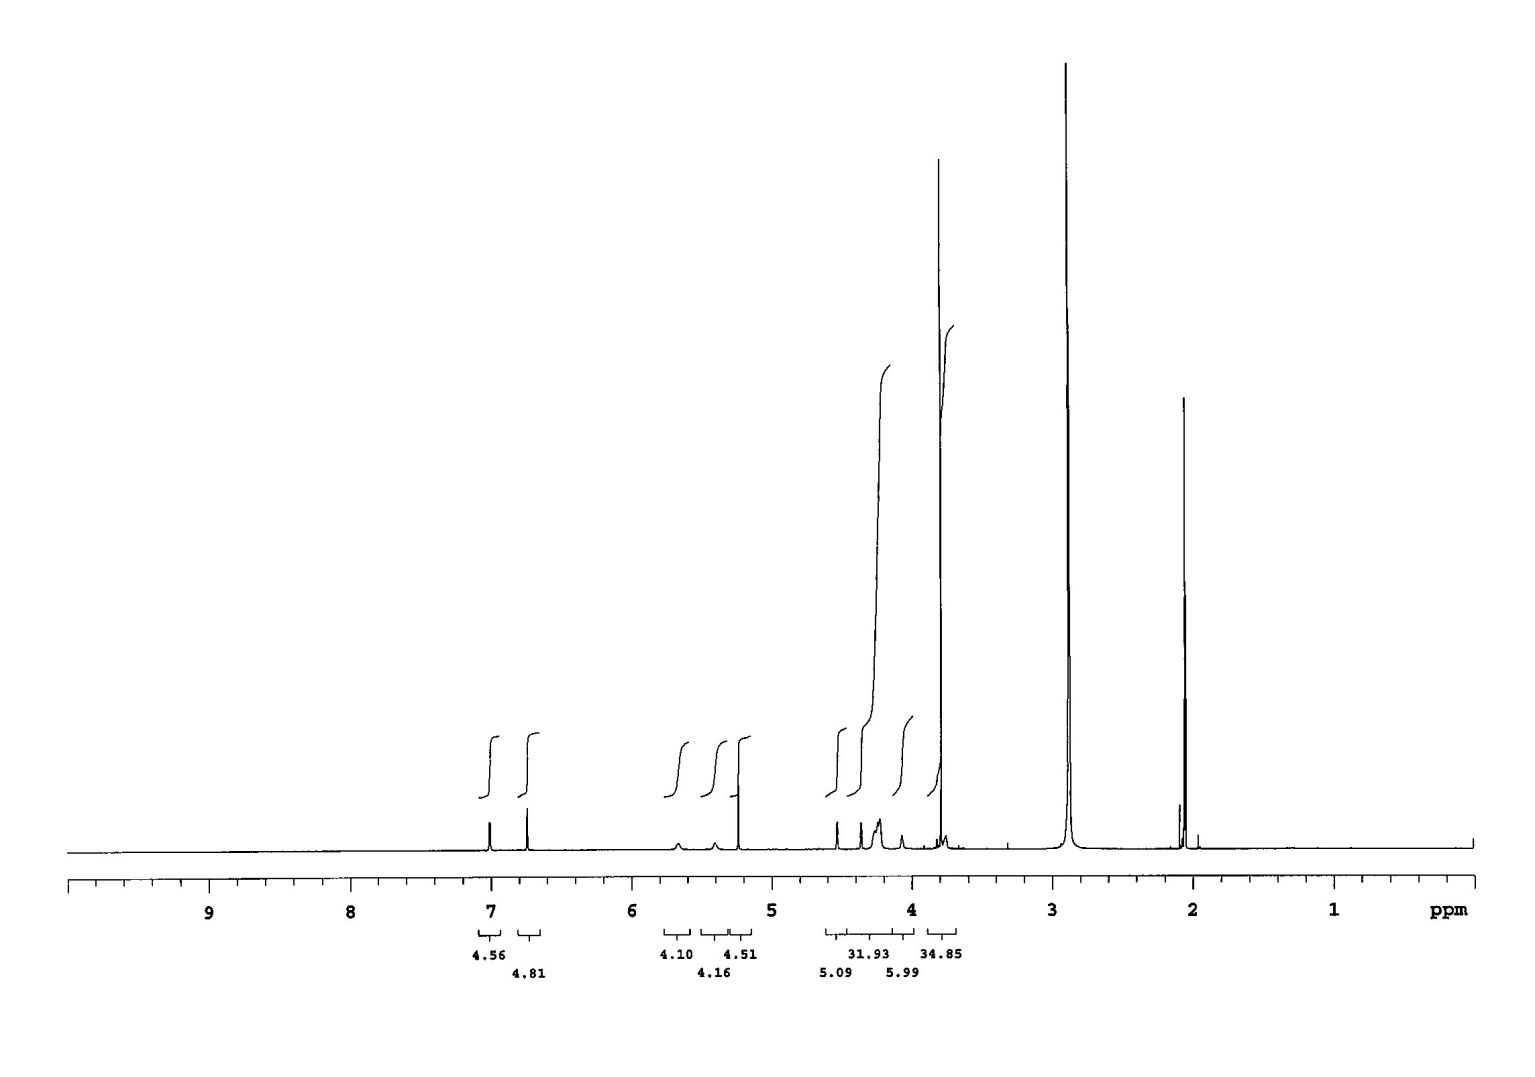 |
| --- |
| 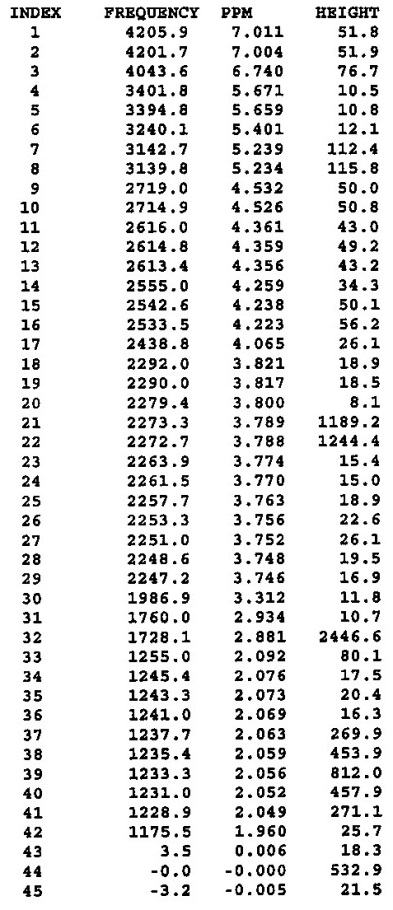 |

**Figure S15.** 1H-NMR spectrum of compound (+)-**6** in acetone-*d*6 (600 MHz).

| 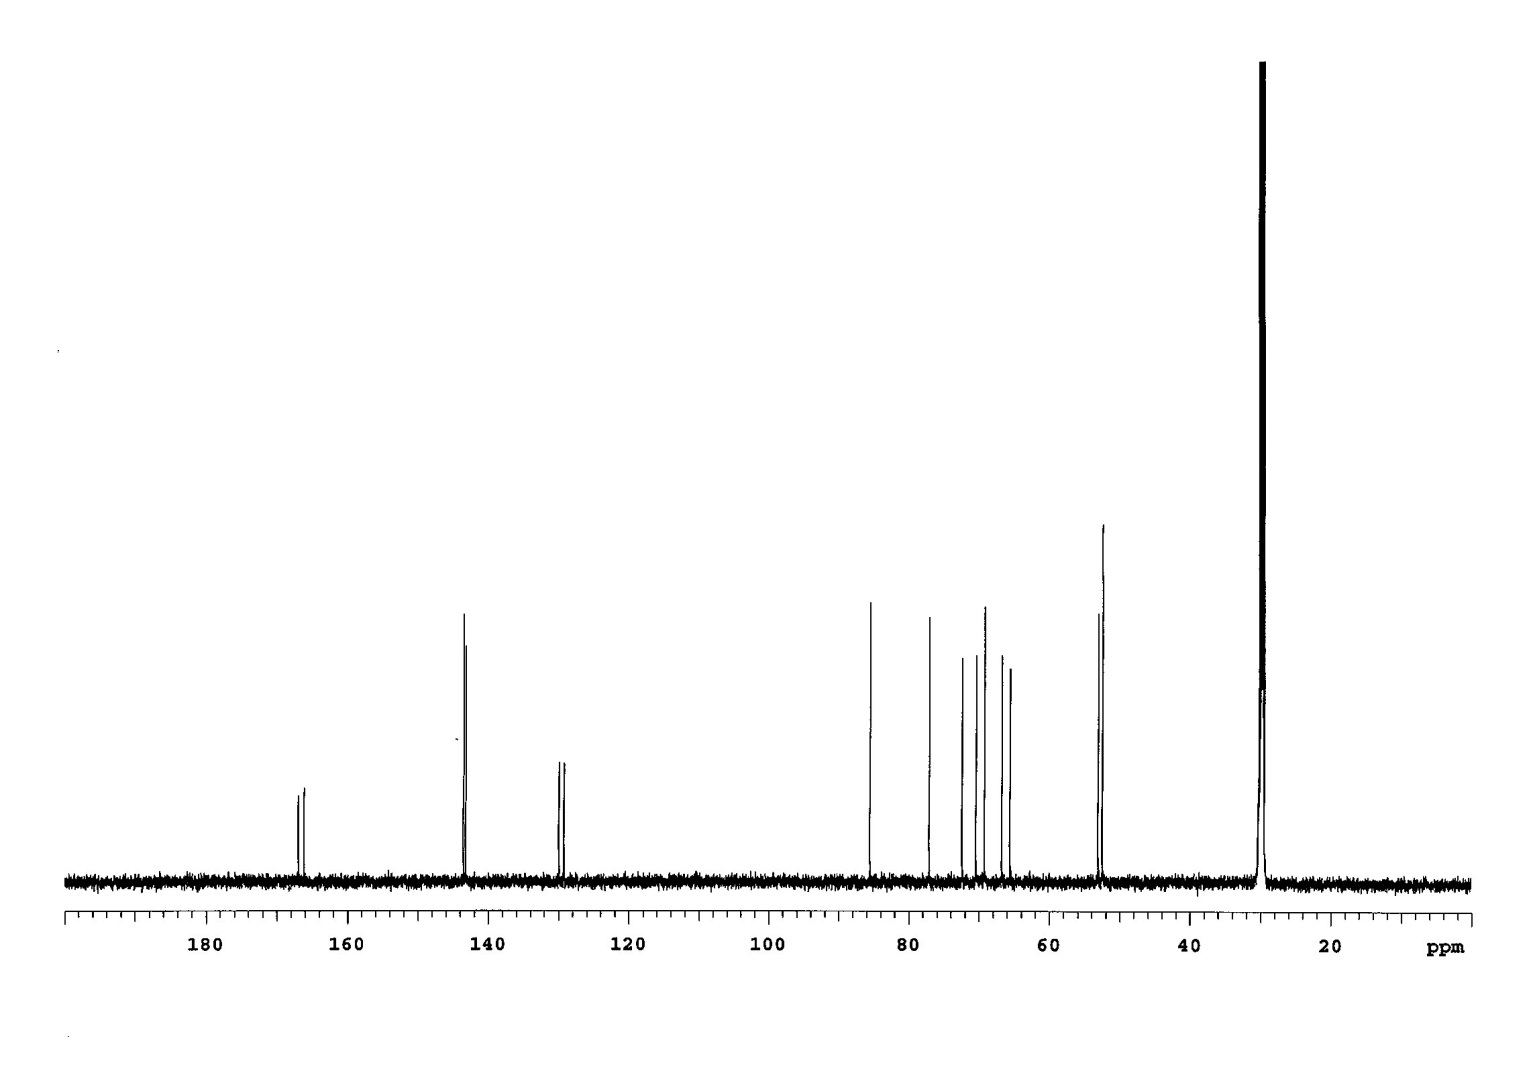 |
| --- |
| 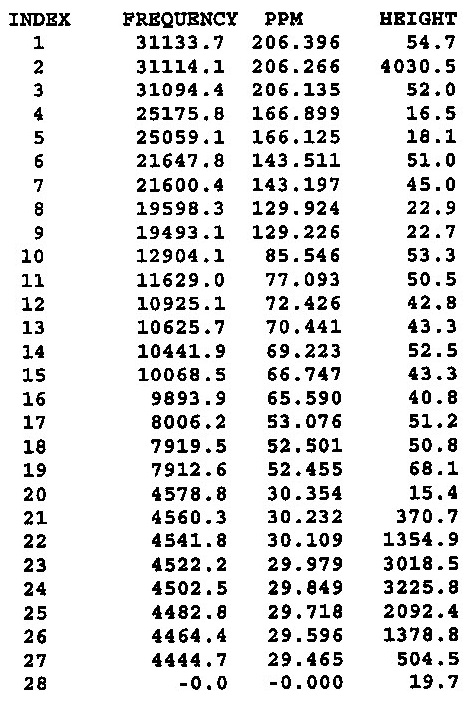 |

**Figure S16.** 13C-NMR spectrum of compound (+)-**6** in acetone-*d*6 (150 MHz).

| 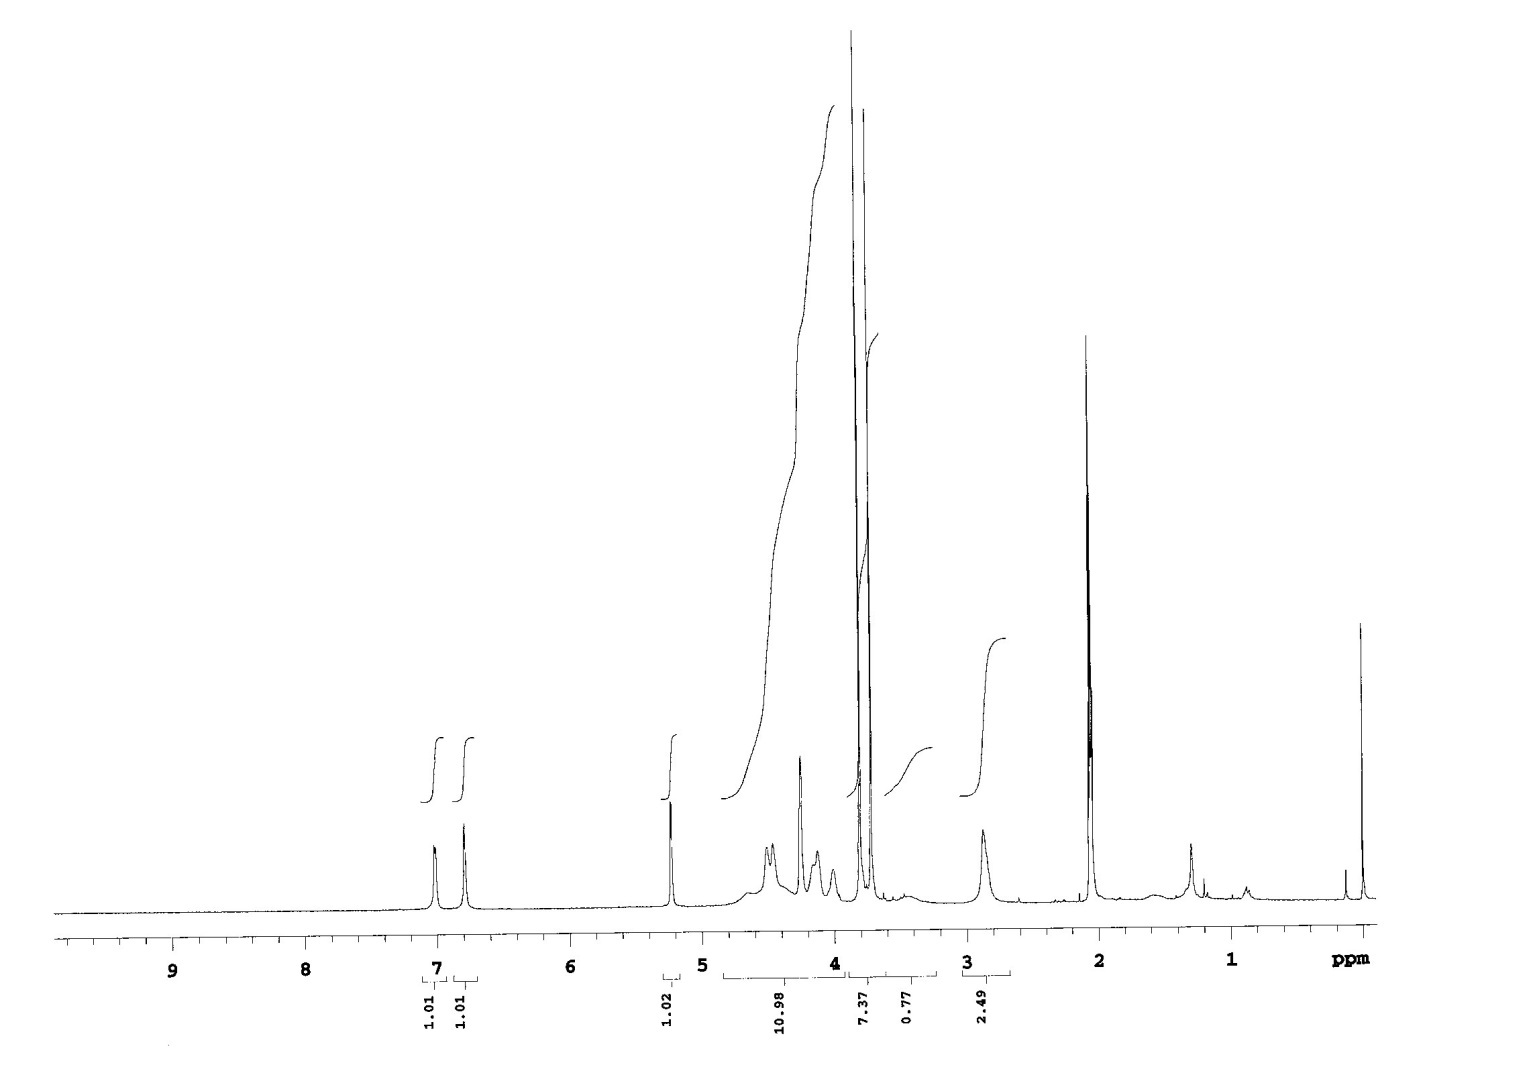 |
| --- |
| 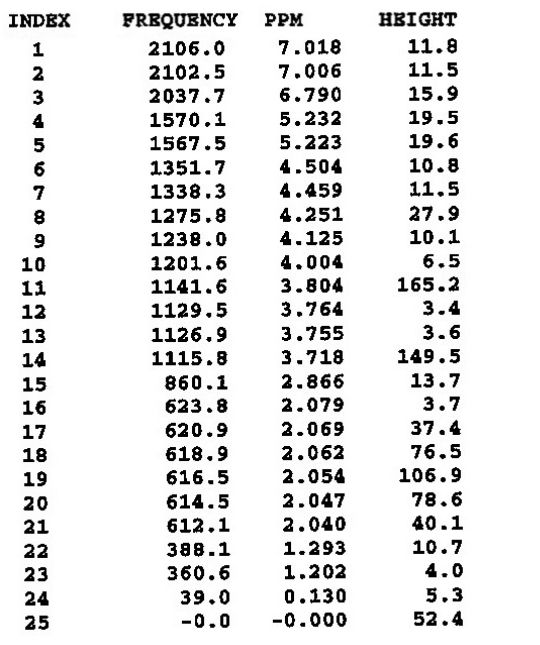 |

**Figure S17.** 1H-NMR spectrum of compound (+)-**21** in acetone-*d*6 (300 MHz).

| 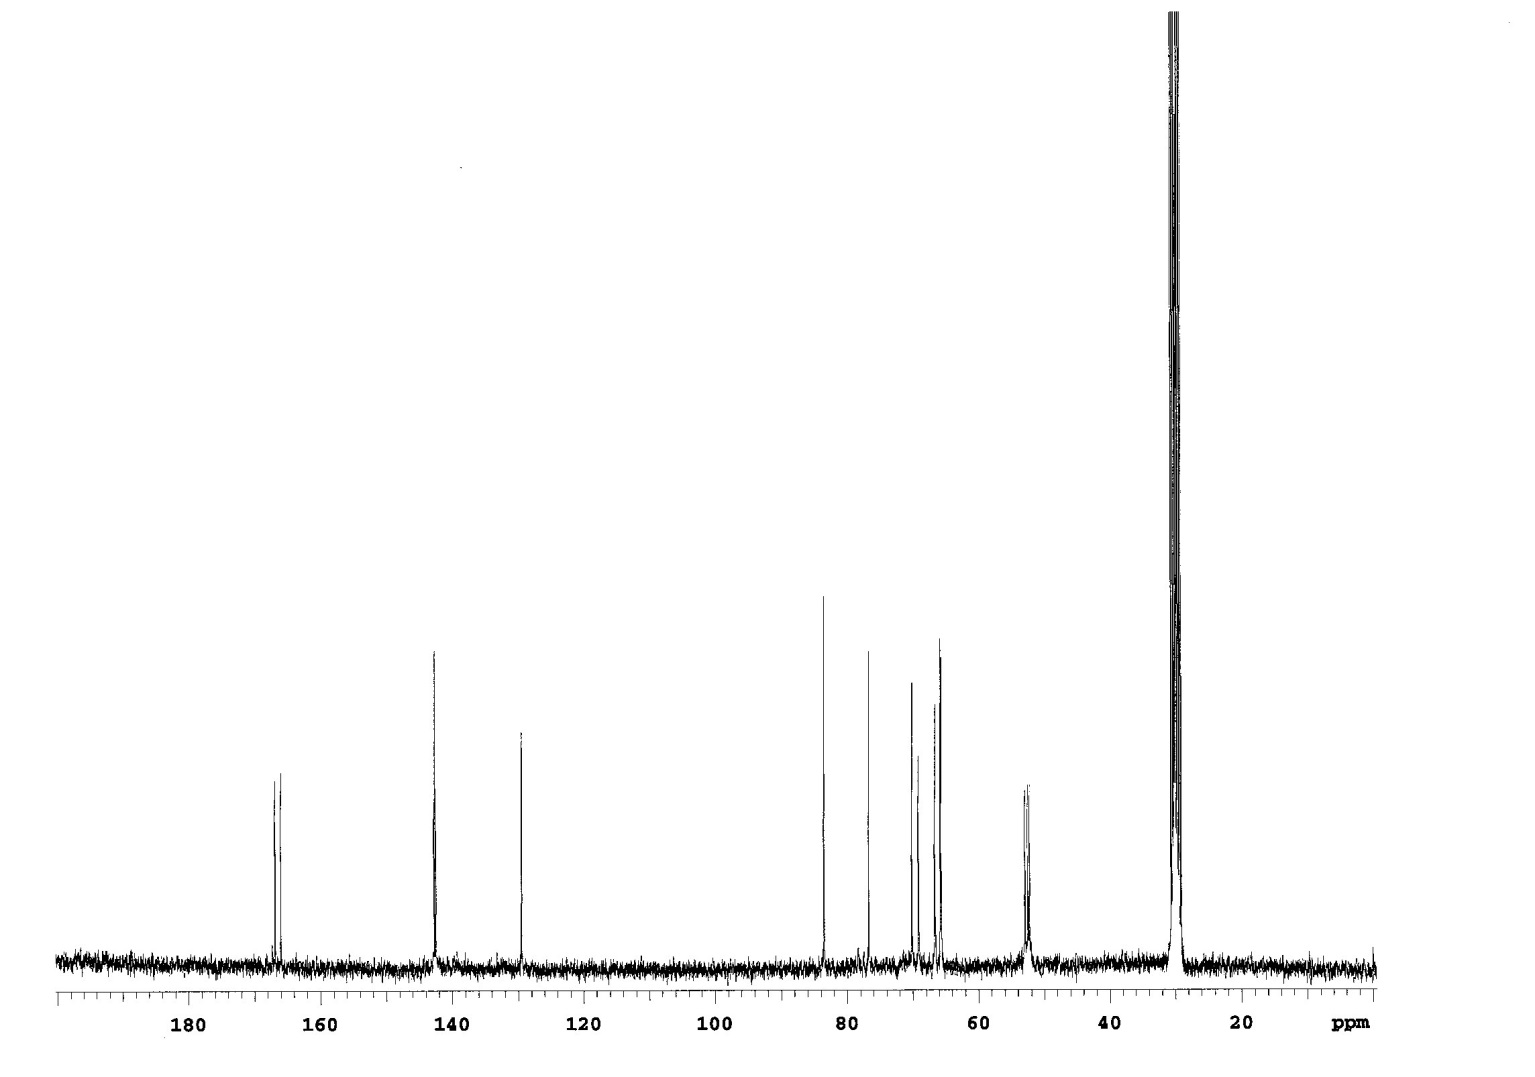 |
| --- |
| 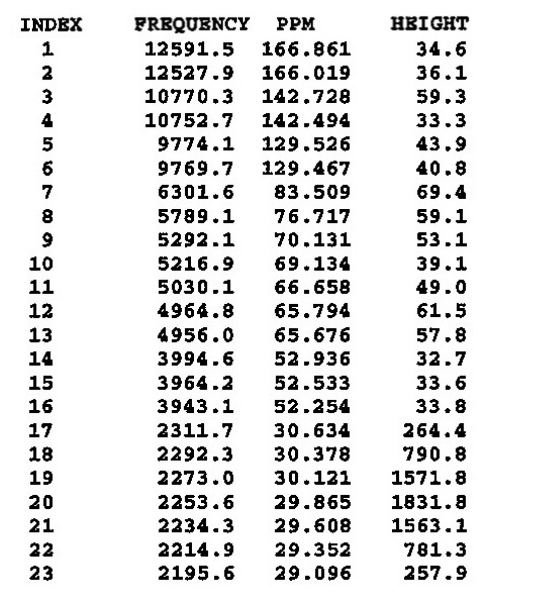 |

**Figure S18.** 13C-NMR spectrum of compound (+)-**21** in acetone-*d*6 (75 MHz).

| 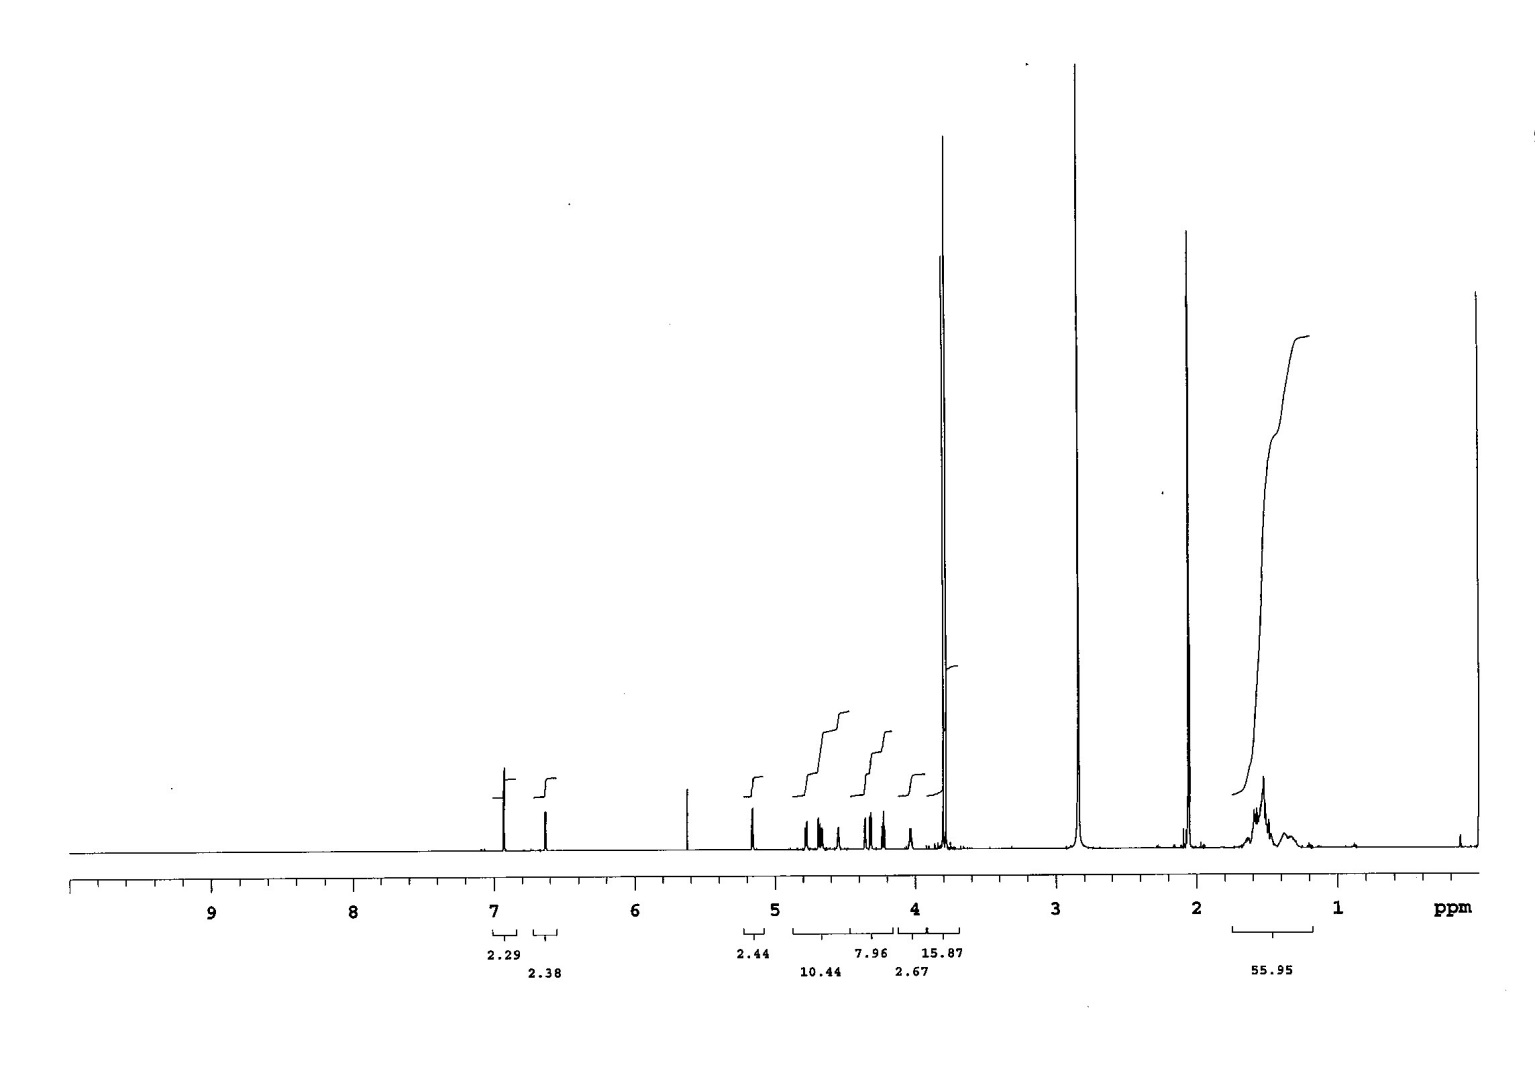 |
| --- |
| 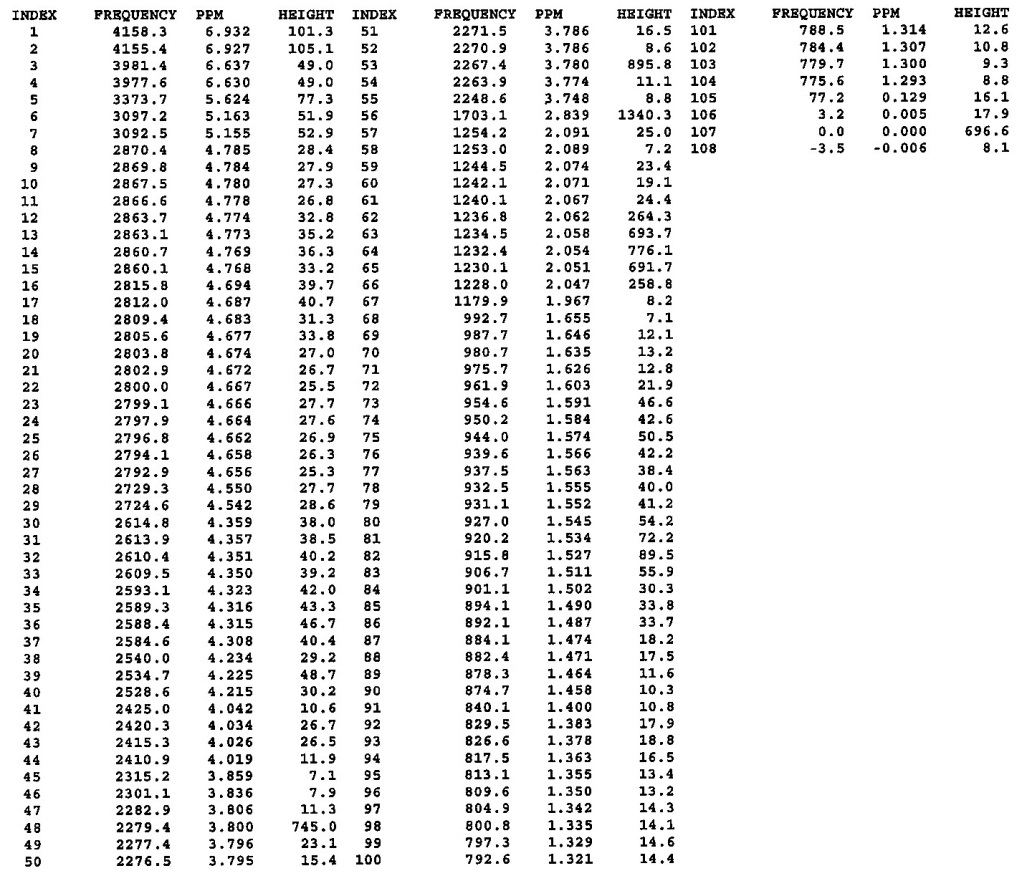 |

**Figure S19.** 1H-NMR spectrum of compound (−)-**24** in acetone-*d*6 (600 MHz).

| 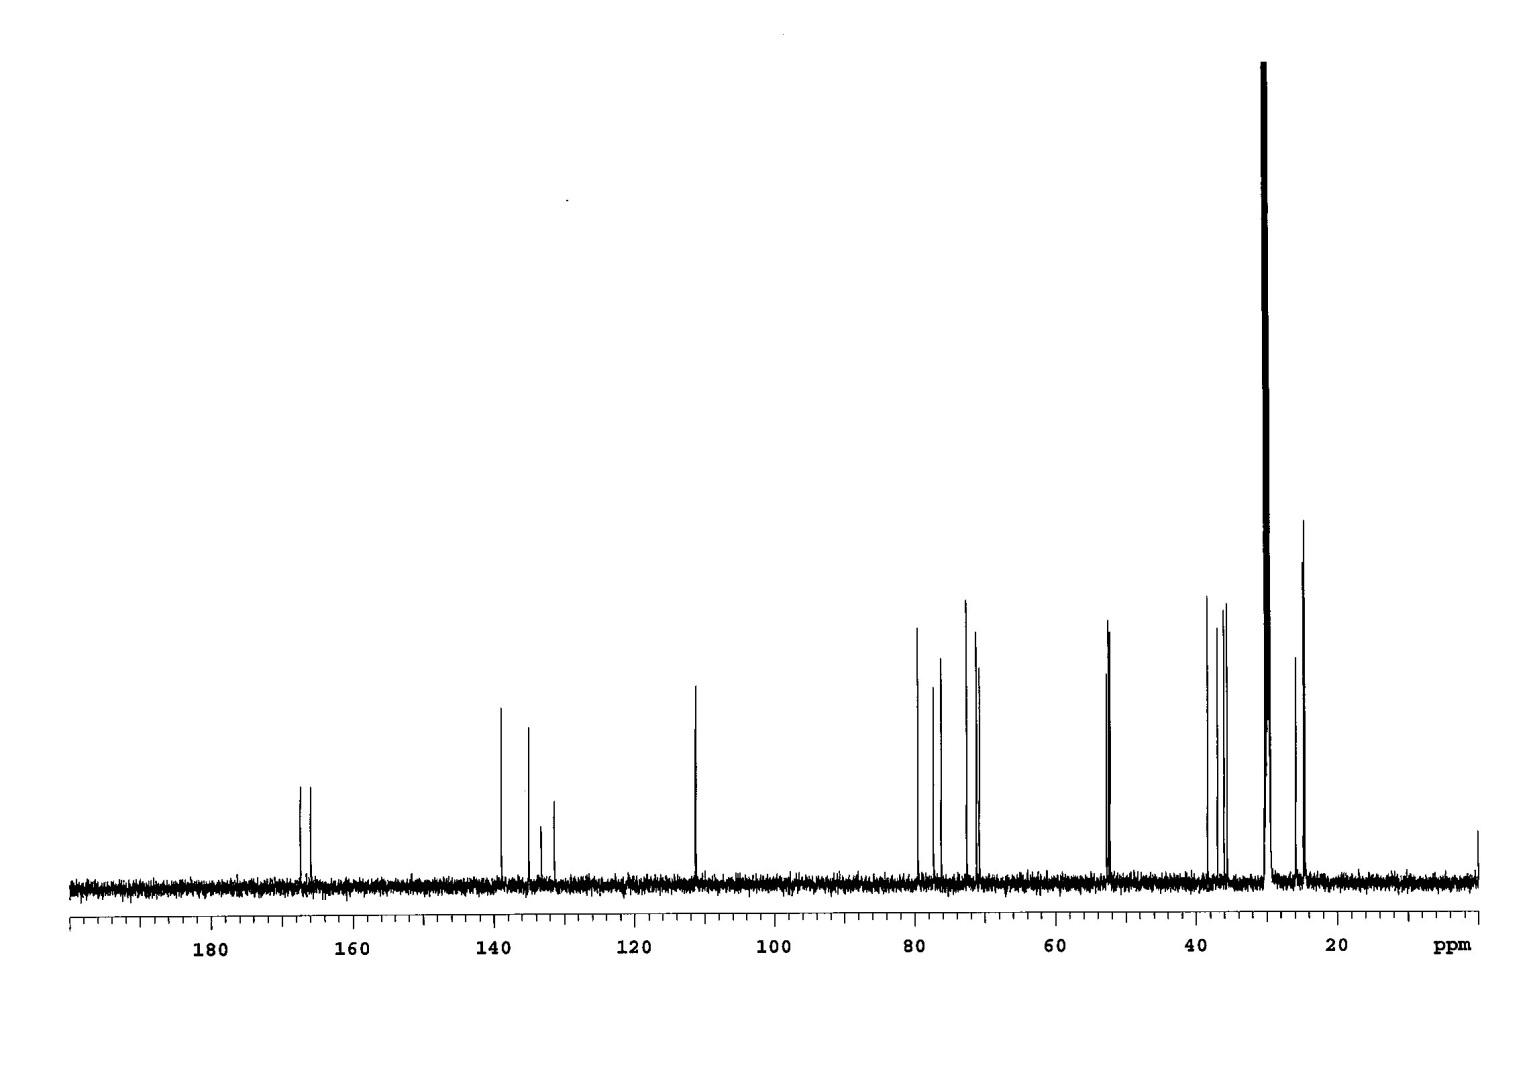 |
| --- |
| 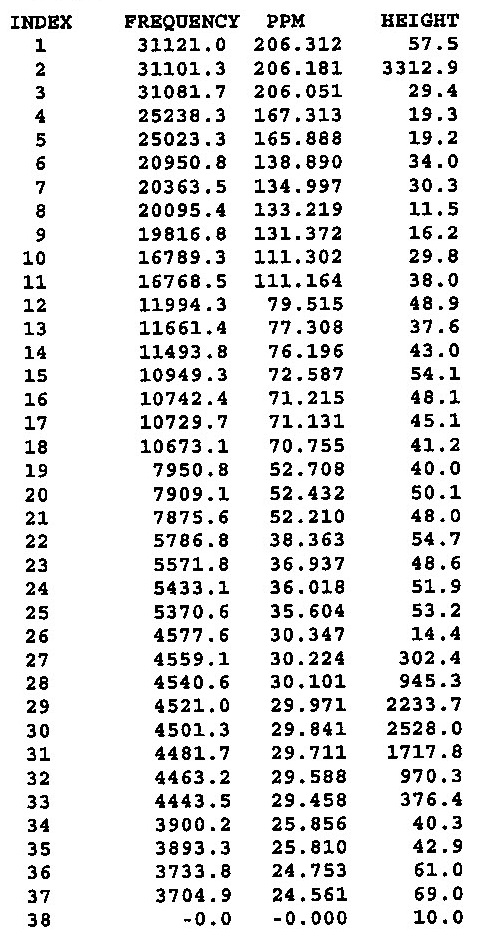 |

**Figure S20.** 13C-NMR spectrum of compound (−)-**24** in acetone-*d*6 (150 MHz).

| 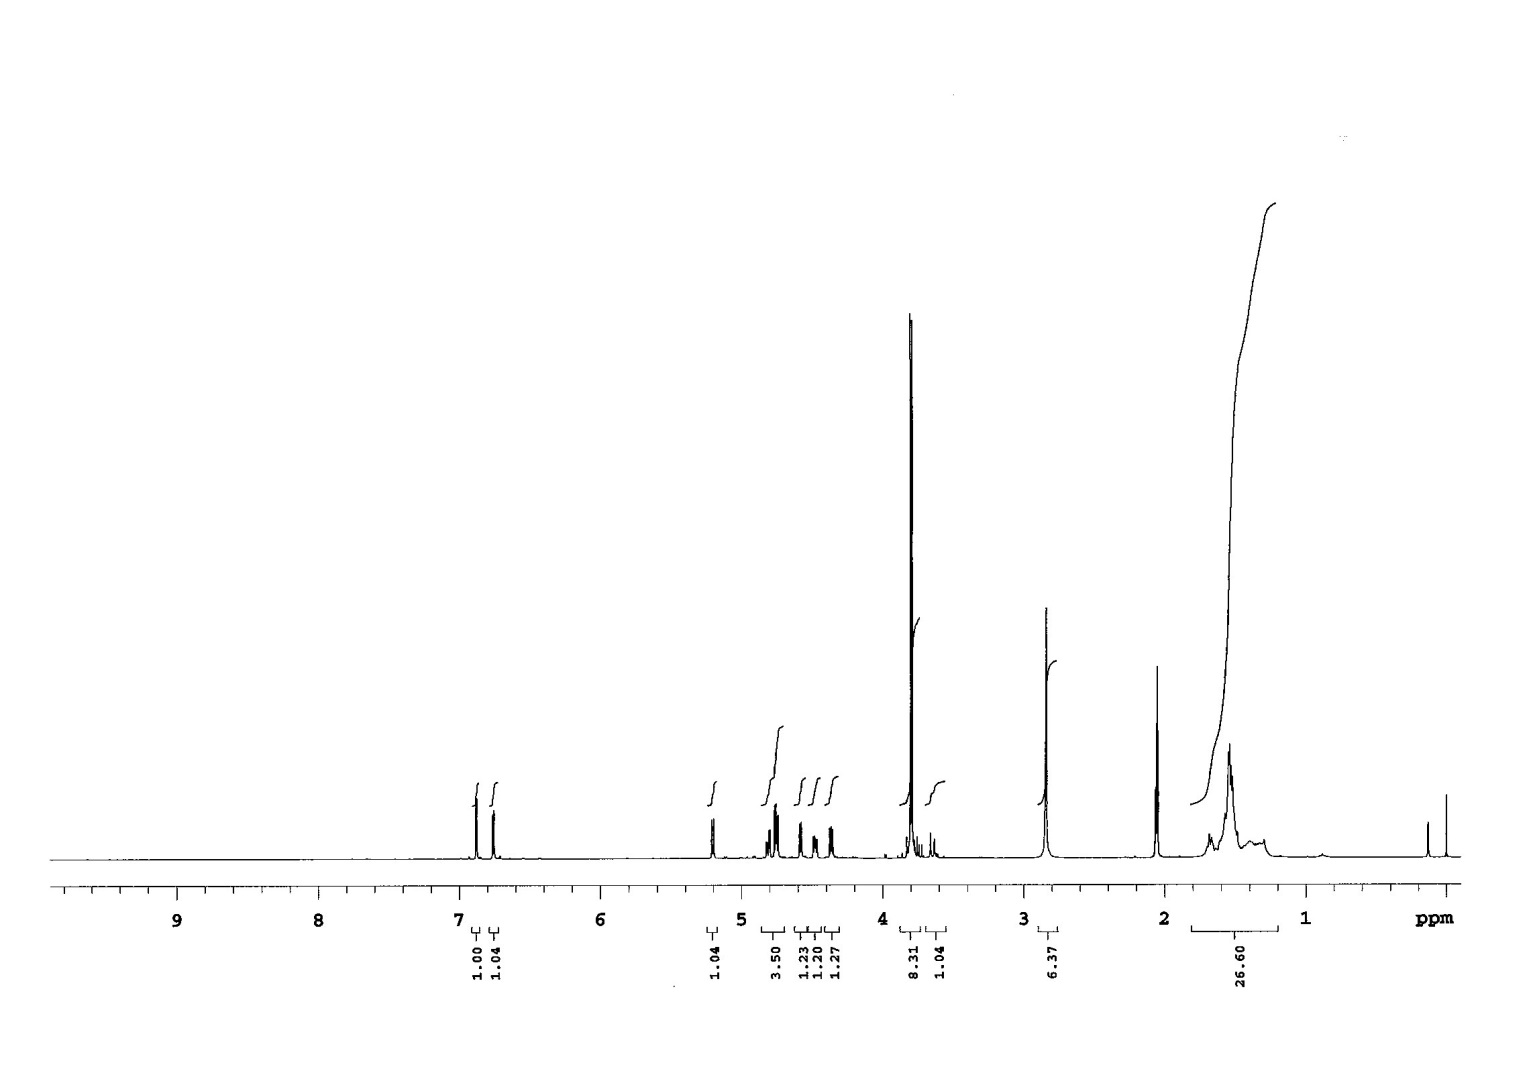 |
| --- |
| 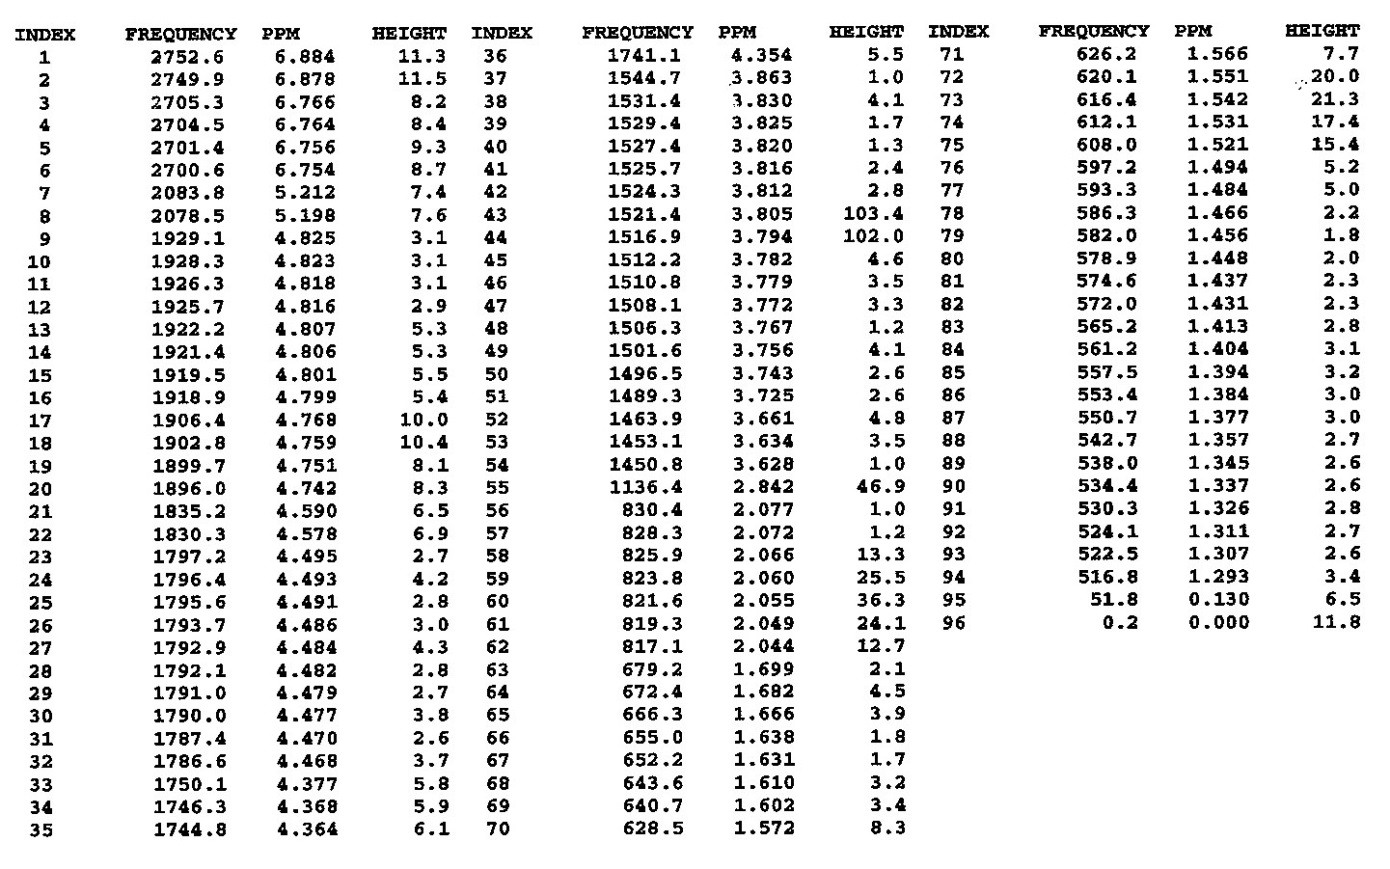 |

**Figure S21.** 1H-NMR spectrum of compound (−)-**25** in acetone-*d*6 (600 MHz).

| 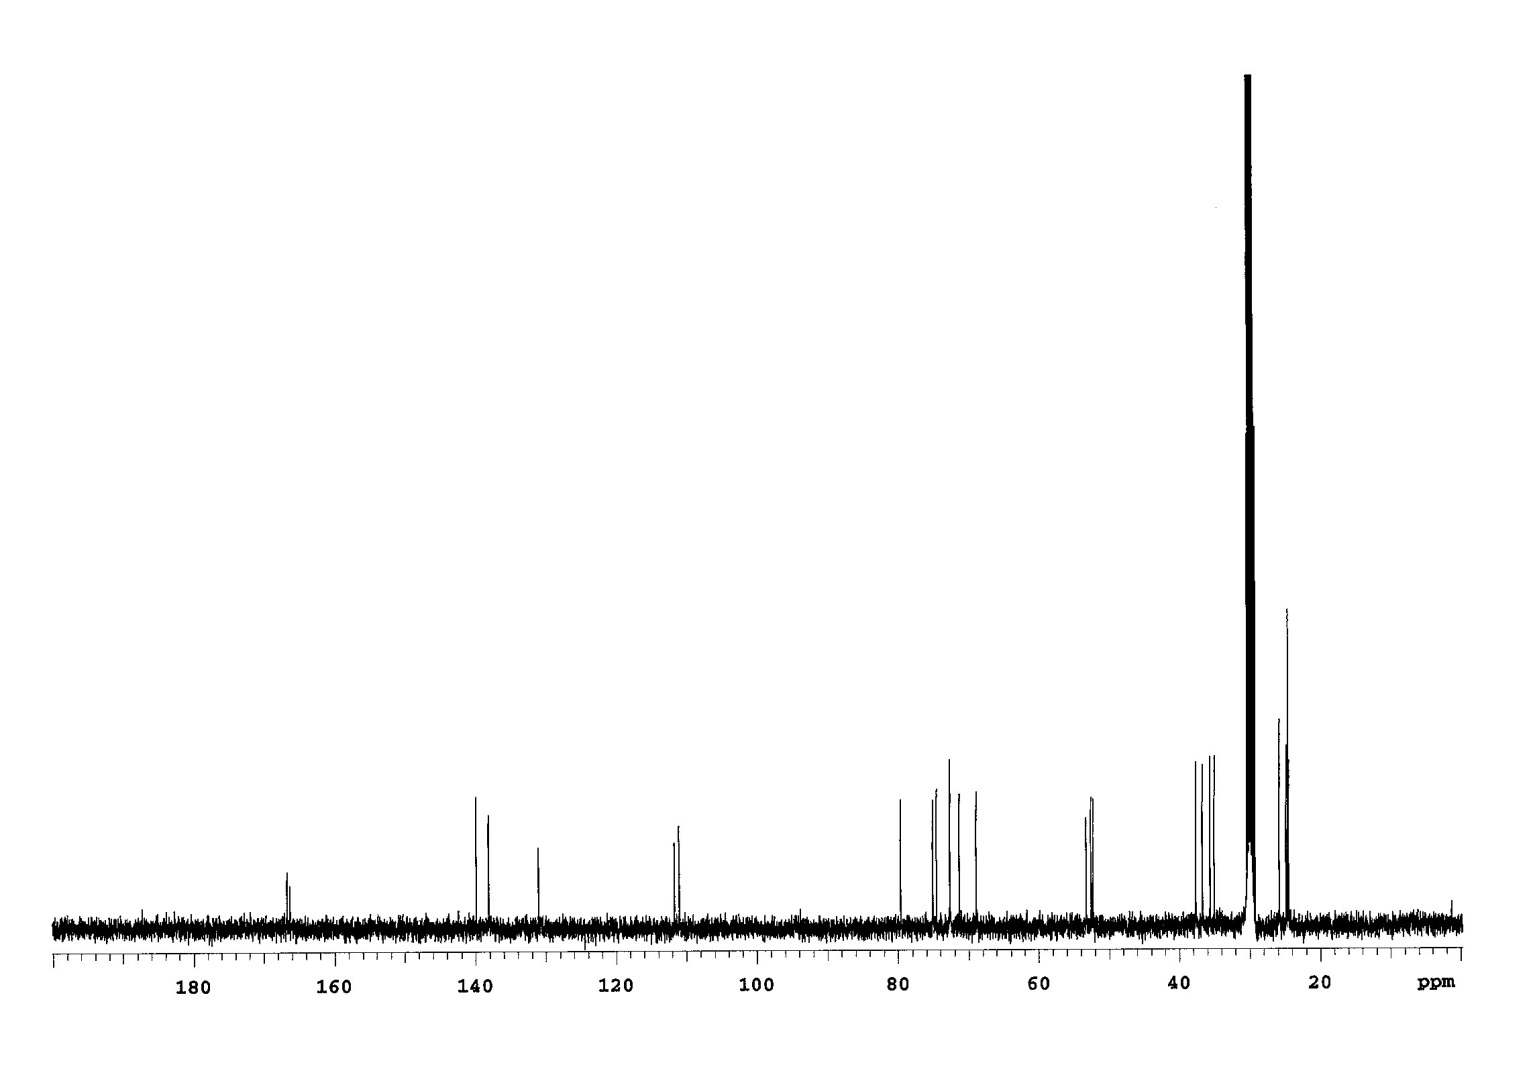 |
| --- |
| 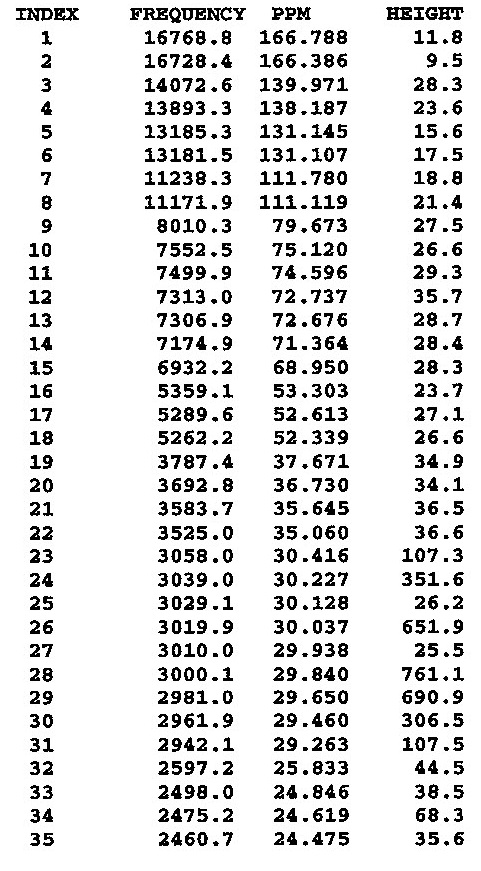 |

**Figure S22.** 13C-NMR spectrum of compound (−)-**25** in acetone-*d*6 (150 MHz).

| 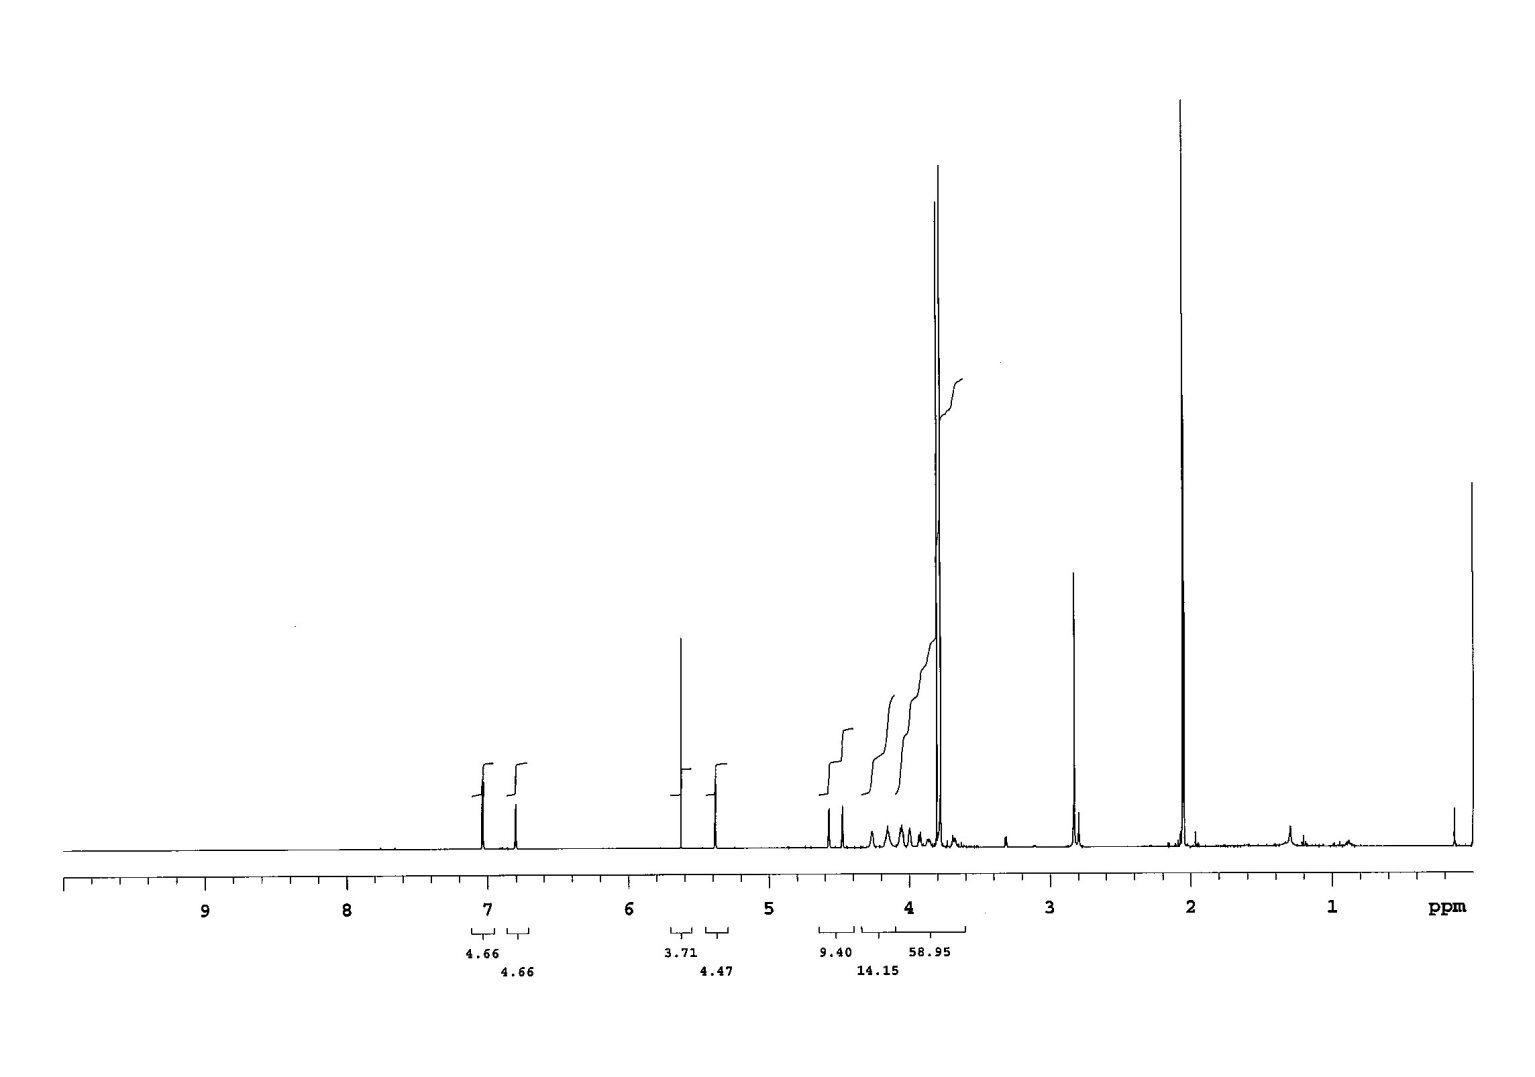 |
| --- |
| 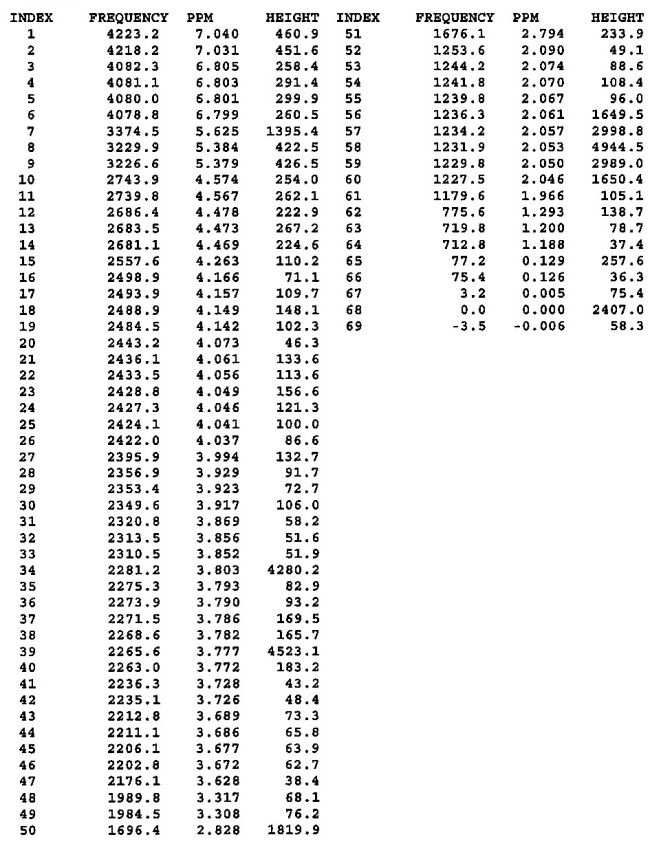 |

**Figure S23.** 1H-NMR spectrum of compound (−)-**22** in acetone-*d*6 (600 MHz).

| 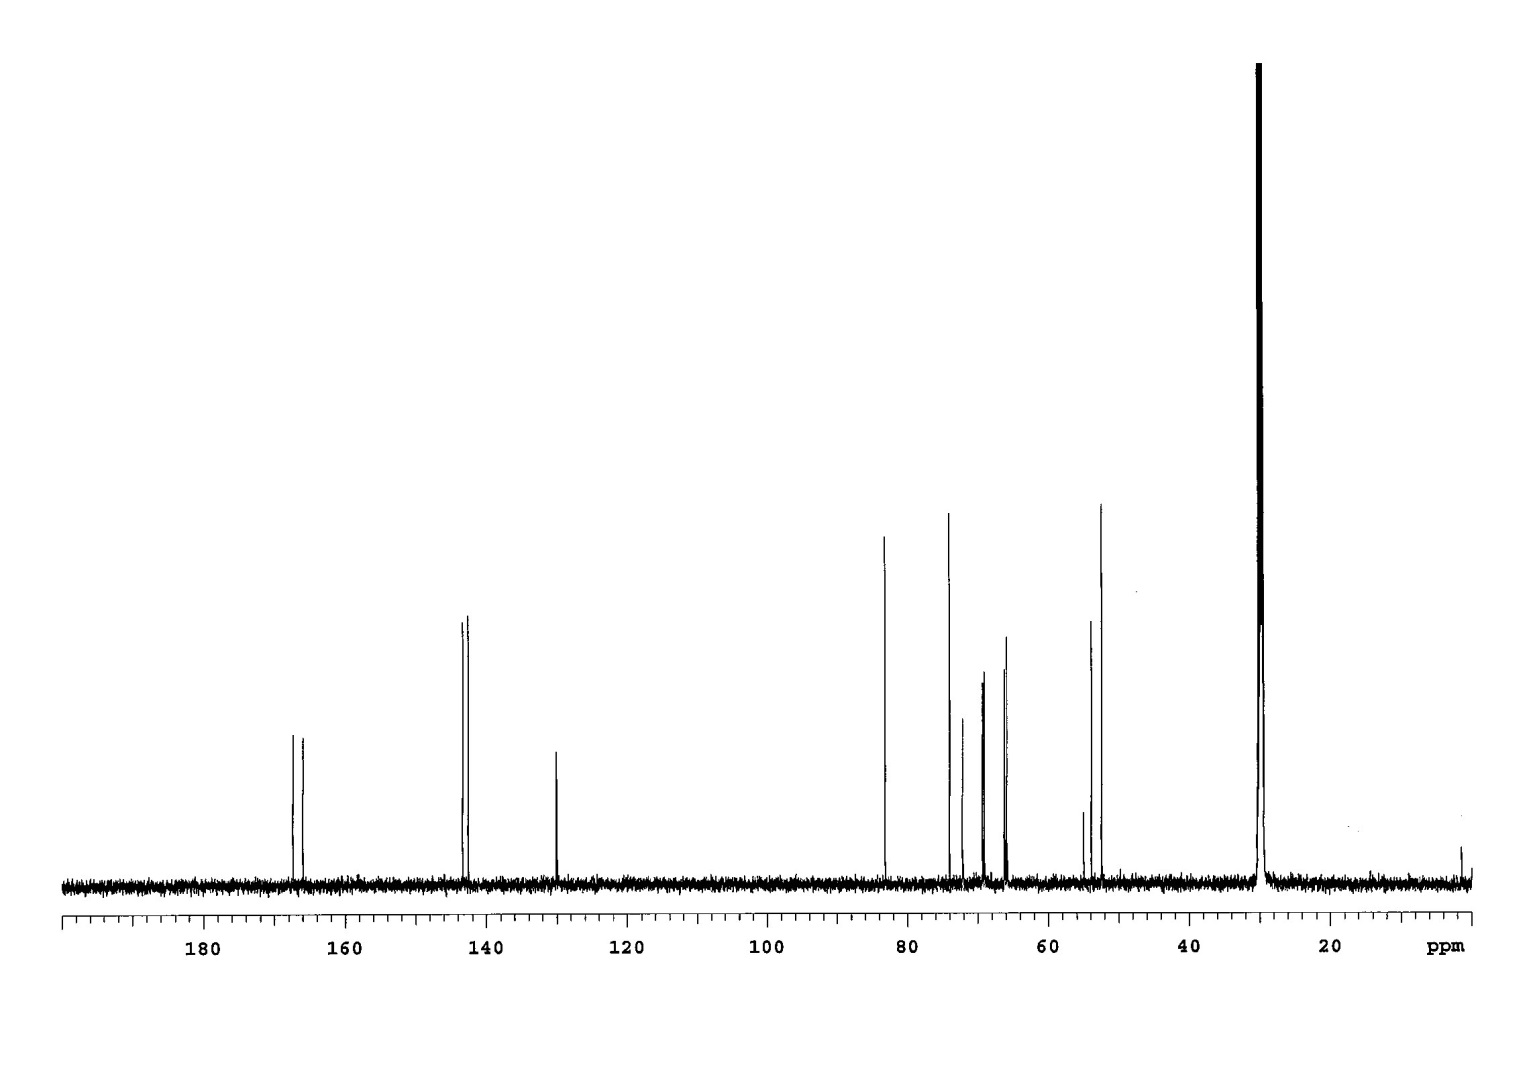 |
| --- |
| 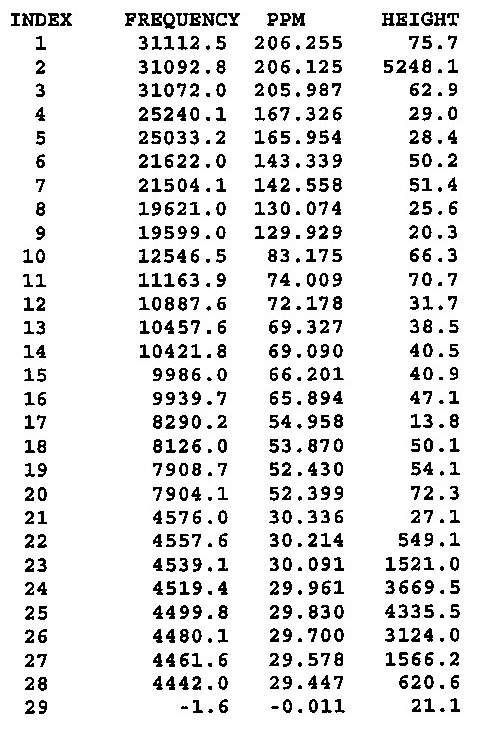 |

**Figure S24.** 13C-NMR spectrum of compound (−)**-22** in acetone-*d*6 (150 MHz).

| 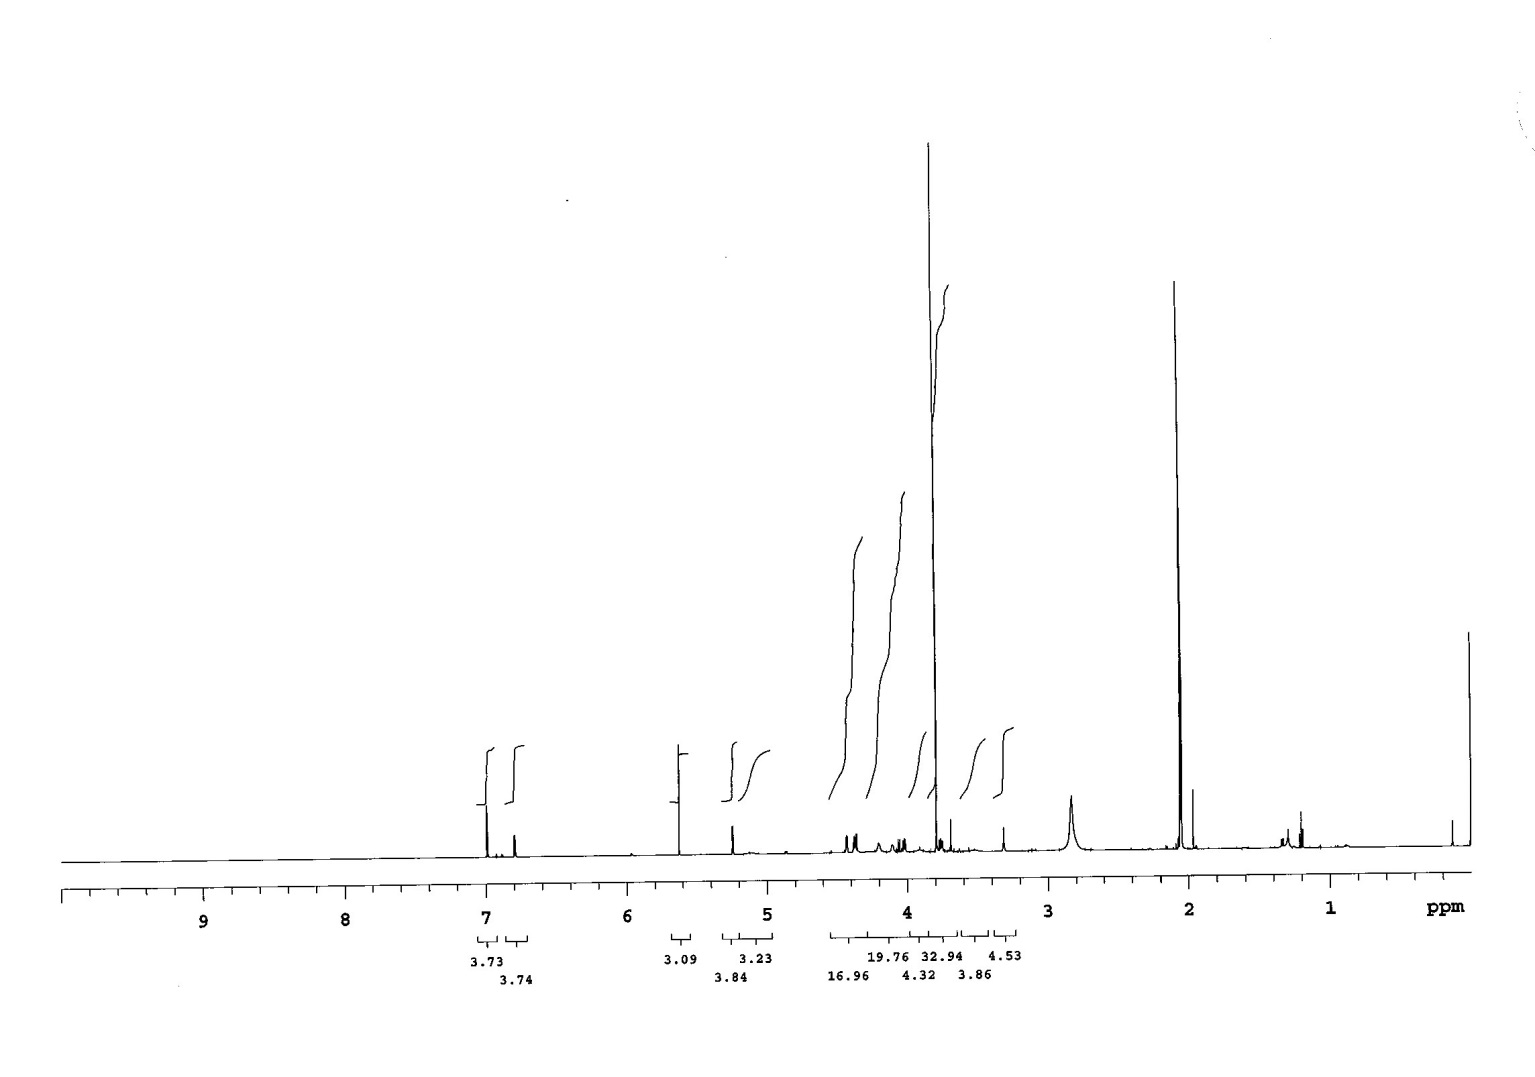 |
| --- |
| 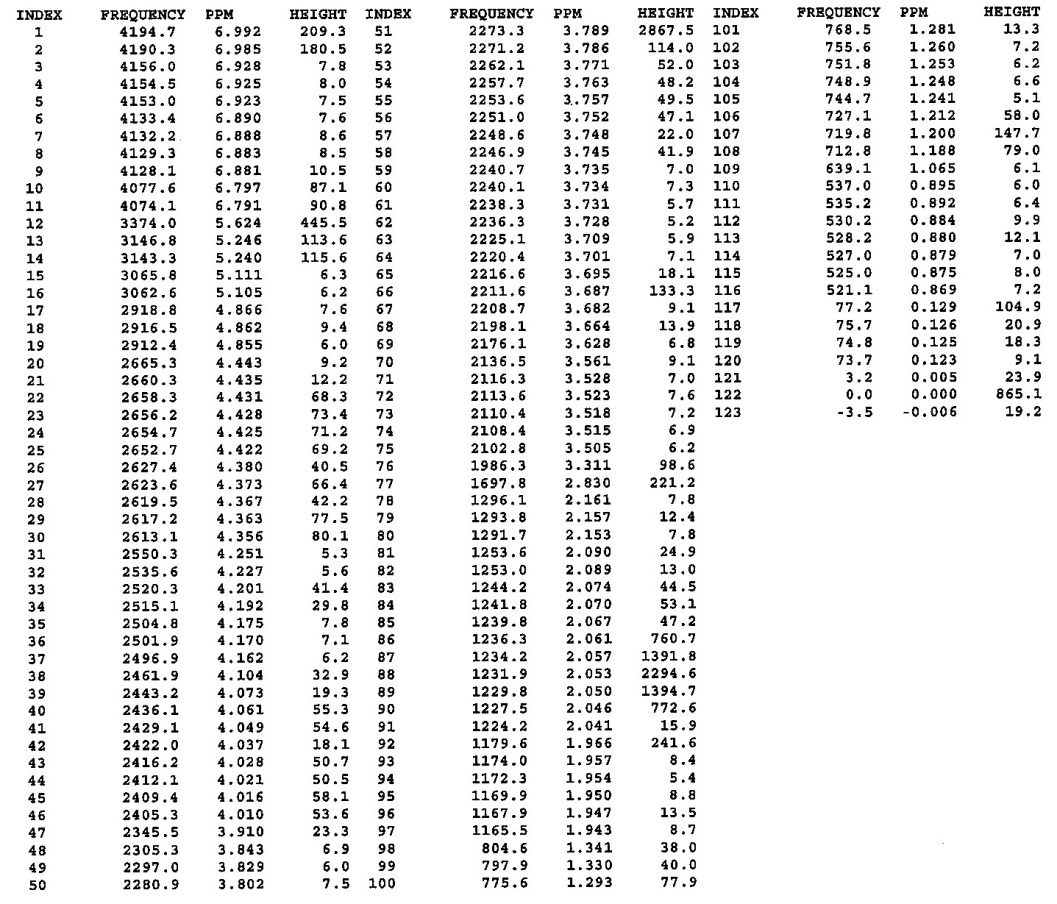 |

**Figure S25.** 1H-NMR spectrum of compound (−)-**23** in acetone-*d*6 (600 MHz).

| 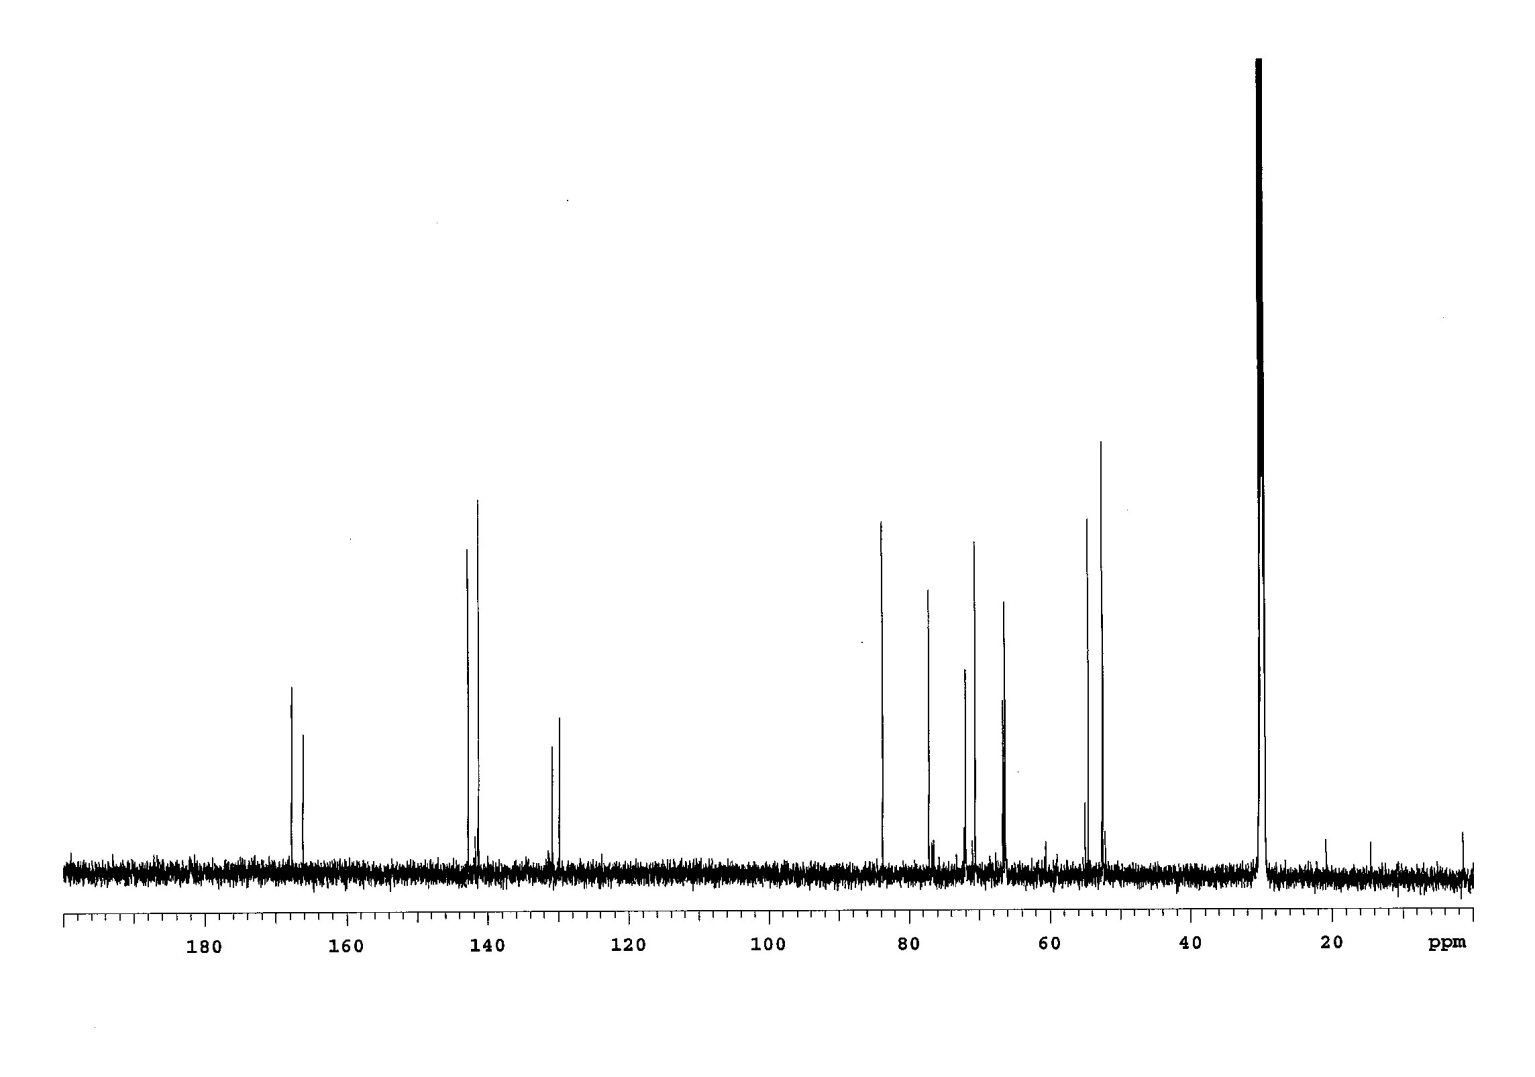 |
| --- |
| 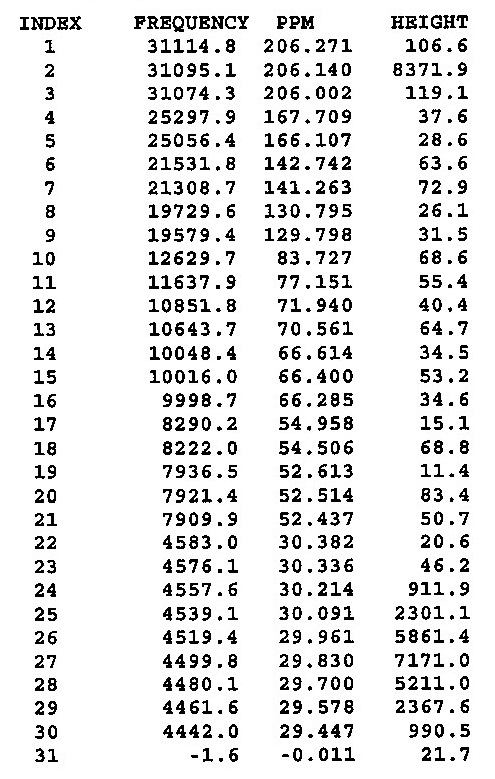 |

**Figure S26.** 13C-NMR spectrum of compound (−)-**23** in acetone-*d*6 (150 MHz).
